1 **Asymmetric structures and conformational plasticity of the uncleaved full-length**  
2 **human immunodeficiency virus (HIV-1) envelope glycoprotein trimer**

3  
4 Shijian Zhang<sup>1,2#</sup>, Kunyu Wang<sup>3#</sup>, Wei Li Wang<sup>1,3,4#</sup>, Hanh T. Nguyen<sup>1,2</sup>, Shuobing  
5 Chen<sup>3</sup>, Maolin Lu<sup>5</sup>, Eden P. Go<sup>6</sup>, Haitao Ding<sup>7</sup>, Robert T. Steinbock<sup>1</sup>, Heather Desaire<sup>6</sup>,  
6 John C. Kappes<sup>7,8</sup>, Joseph Sodroski<sup>1,2,9,\*</sup> and Youdong Mao<sup>1,3,4,\*</sup>

7  
8 <sup>1</sup>Department of Cancer Immunology and Virology, Dana-Farber Cancer Institute,  
9 Boston, MA 02215, USA.

10  
11 <sup>2</sup>Department of Microbiology, Harvard Medical School, Boston, MA 02115, USA.

12  
13 <sup>3</sup>State Key Laboratory for Artificial Microstructures and Mesoscopic Physics, School of  
14 Physics, Center for Quantitative Biology, Peking University, Beijing 100871, China.

15  
16 <sup>4</sup>Intel Parallel Computing Center for Structural Biology, Dana-Farber Cancer Institute,  
17 Boston, MA 02215, USA.

18  
19 <sup>5</sup>Department of Microbial Pathogenesis, Yale University School of Medicine, New  
20 Haven, CT 06536, USA.

21  
22 <sup>6</sup>Department of Chemistry, University of Kansas, Lawrence, KS 66049, USA.

23

24 <sup>7</sup>Department of Medicine, University of Alabama at Birmingham, AL 35294, USA.

25

26 <sup>8</sup>Birmingham Veterans Affairs Medical Center, Research Service, Birmingham, AL  
27 35294, USA.

28

29 <sup>9</sup>Department of Immunology and Infectious Disease, Harvard T.H. Chan School of  
30 Public Health, Boston, MA 02115, USA.

31

32 #Shijian Zhang, Kunyu Wang and Wei Li Wang contributed equally to this article.

33 Authorship order was determined by mutual agreement.

34

35 \*Corresponding authors:  
36 Joseph G. Sodroski, M.D.  
37 Dana-Farber Cancer Institute  
38 450 Brookline Avenue, CLS 1010  
39 Boston, MA 02215  
40 Phone: 617-632-3371 Fax: 617-632-4338  
41 Email: joseph\_sodroski@dfci.harvard.edu

42

43 Youdong Mao, Ph.D.  
44 Dana-Farber Cancer Institute  
45 450 Brookline Avenue, CLS 1010  
46 Boston, MA 02215  
47 Phone: 617-632-4358 Fax: 617-632-4338  
48 Email: youdong\_mao@dfci.harvard.edu

49

50

51 **Running Title:** HIV-1 envelope glycoprotein precursor flexibility

52 **Word Count Abstract:** 250

53 **Word Count Text:** 16,865 including refs and fig legends/

54 9,962 excluding refs and fig legends

55 **ABSTRACT**

56 The functional human immunodeficiency virus (HIV-1) envelope glycoprotein (Env)  
57 trimer [(gp120/gp41)<sub>3</sub>] is produced by cleavage of a conformationally flexible gp160  
58 precursor. Gp160 cleavage or the binding of BMS-806, an entry inhibitor, stabilizes the  
59 pre-triggered, “closed” (State-1) conformation recognized by rarely elicited broadly  
60 neutralizing antibodies. Poorly neutralizing antibodies (pNAbs) elicited at high titers  
61 during natural infection recognize more “open” Env conformations (States 2 and 3)  
62 induced by binding the receptor, CD4. We found that BMS-806 treatment and  
63 crosslinking decreased the exposure of pNAb epitopes on cell-surface gp160; however,  
64 after detergent solubilization, crosslinked and BMS-806-treated gp160 sampled non-  
65 State-1 conformations that could be recognized by pNAbs. Cryo-electron microscopy of  
66 the purified BMS-806-bound gp160 revealed two hitherto unknown asymmetric trimer  
67 conformations, providing insights into the allosteric coupling between trimer opening  
68 and structural variation in the gp41 HR1<sub>N</sub> region. The individual protomer structures in  
69 the asymmetric gp160 trimers resemble those of other genetically modified or antibody-  
70 bound cleaved HIV-1 Env trimers, which have been suggested to assume State-2-like  
71 conformations. Asymmetry of the uncleaved Env potentially exposes surfaces of the  
72 trimer to pNAbs. To evaluate the effect of stabilizing a State-1-like conformation of the  
73 membrane Env precursor, we treated cells expressing wild-type HIV-1 Env with BMS-  
74 806. BMS-806 treatment decreased both gp160 cleavage and the addition of complex  
75 glycans, implying that gp160 conformational flexibility contributes to the efficiency of  
76 these processes. Selective pressure to maintain flexibility in the precursor of functional

- 77 Env allows the uncleaved Env to sample asymmetric conformations that potentially
- 78 skew host antibody responses toward pNAbs.

79 **IMPORTANCE**

80 The envelope glycoprotein (Env) trimers on the surface of human immunodeficiency  
81 virus (HIV-1) mediate the entry of the virus into host cells and serve as targets for  
82 neutralizing antibodies. The functional Env trimer is produced by cleavage of the gp160  
83 precursor in the infected cell. We found that the HIV-1 Env precursor is highly plastic,  
84 allowing it to assume different asymmetric shapes. This conformational plasticity is  
85 potentially important for Env cleavage and proper modification by sugars. Having a  
86 flexible, asymmetric Env precursor that can misdirect host antibody responses without  
87 compromising virus infectivity would be an advantage to a persistent virus like HIV-1.

88

89 Key words: Env, cleavage, furin, processing, conformation, cryo-electron microscopy,  
90 structure, antibody, asymmetry

91

92 **INTRODUCTION**

93 Human immunodeficiency virus (HIV-1), the etiologic agent of acquired  
94 immunodeficiency syndrome (AIDS), utilizes a metastable envelope glycoprotein (Env)  
95 trimer to engage host receptors and enter target cells (1). The functional Env trimer  
96 consists of three gp120 exterior subunits and three gp41 transmembrane subunits (1-3).  
97 During virus entry, gp120 engages the receptors, CD4 and CCR5/CXCR4, and gp41  
98 fuses the viral and cell membranes (4-16). Env is the only virus-specific protein on the  
99 viral surface and is targeted by host antibodies (17-20).

100

101 In infected cells, the HIV-1 Env trimer is synthesized in the rough endoplasmic  
102 reticulum (ER), where signal peptide cleavage, folding, trimerization and the addition of  
103 high-mannose glycans take place (21-24). The resulting gp160 Env precursor is  
104 transported to the Golgi apparatus, where some of the glycans are modified to complex  
105 types and proteolytic cleavage by host furin-like proteases produces the gp120 and  
106 gp41 subunits (25-41). The proteolytically processed, mature Env trimers are  
107 transported to the cell surface and incorporated into virions.

108

109 On the membrane of primary HIV-1, Env exists in a pre-triggered, “closed”  
110 conformation (State 1) that resists the binding of commonly elicited antibodies (42-47).  
111 Binding to the receptor, CD4, on the target cell releases the restraints that maintain Env  
112 in State 1, allowing transitions through a default intermediate conformation (State 2) to  
113 the pre-hairpin intermediate (State 3) (42,48,49). In the more “open” State-3 Env  
114 conformation, a trimeric coiled coil composed of the gp41 heptad repeat (HR1) region is

115 formed and exposed, as is the gp120 binding site for the second receptor, either CCR5  
116 or CXCR4 (50-58). Binding to these chemokine receptors is thought to promote the  
117 insertion of the hydrophobic gp41 fusion peptide into the target cell membrane and the  
118 formation of a highly stable six-helix bundle, which mediates viral-cell membrane fusion  
119 (14-16,59-62).

120

121         The ability of HIV-1 to establish persistent infections in humans requires an Env  
122 trimer that minimally elicits neutralizing antibodies and resists the binding of antibodies  
123 generated during the course of natural infection. In addition to a heavy glycan shield  
124 and surface variability, the conformational flexibility and plasticity of Env may help HIV-1  
125 avoid the host antibody response (45,47,63-66). Flexible Envs could present epitopes  
126 that are not exposed on the State-1 Env trimer, misdirecting host antibodies away from  
127 the functional virus spike. The vast majority of antibodies elicited by Env during natural  
128 HIV-1 infection are unable to bind the functional State-1 Env trimer, and instead  
129 recognize downstream conformations (States 2, 2A and 3) (67-71). These antibodies  
130 cannot access their epitopes once the virus has bound CD4 and therefore do not  
131 neutralize efficiently (70). Uncleaved Envs that assume State-2/3 conformations are  
132 abundant on the surface of HIV-1-infected cells, in some cases reaching the cell surface  
133 by bypassing the Golgi (72). Poorly neutralizing antibodies (pNAbs) with State-2/3  
134 specificity typically recognize these uncleaved Envs more efficiently than cleaved Env  
135 (73-79). Crosslinking the uncleaved cell-surface Env exerted effects on Env antigenicity  
136 similar to those resulting from gp120-gp41 cleavage, suggesting that the uncleaved Env  
137 might be more flexible than mature Env (80). Indeed, recent single-molecule

138 fluorescence resonance energy transfer (smFRET) analysis confirmed that, in contrast  
139 to the dominant State-1 conformation of the wild-type Env, an Env mutant unable to be  
140 proteolytically processed due to an alteration of the cleavage site occupies States 2 and  
141 3 more frequently than State 1 (81). Thus, the abundant, cell-surface-accessible and  
142 conformationally heterogeneous uncleaved Env could misdirect host immune responses  
143 away from the elicitation of broadly neutralizing antibodies, which generally recognize  
144 the State-1 Env conformation (42,45,46,48,81). Broadly neutralizing antibodies (bNAbs)  
145 typically appear after several years of HIV-1 infection and only in a minority of HIV-1-  
146 infected individuals (83-91).

147

148         Here, we investigate the conformation of the uncleaved HIV-1 Env trimer, both on  
149 the cell surface and purified from membranes. Cryo-electron microscopy (cryo-EM)  
150 reconstructions reveal that purified uncleaved Envs preferentially assume asymmetric  
151 trimer conformations, exposing epitopes for pNAbs. We identified a gp41 region in  
152 which structural changes are coupled to the asymmetric opening of the Env trimer. We  
153 tested the effect of a State-1-stabilizing gp120 ligand, BMS-378806 (herein called BMS-  
154 806) on the cleavage and glycosylation of the wild-type Env. Our findings indicate the  
155 importance of conformational plasticity of the uncleaved HIV-1 Env trimer for efficient  
156 proteolytic maturation, complex glycan addition and evasion of host antibody responses.

157



158 **RESULTS**

159 **Analysis of the conformation of uncleaved HIV-1 Env on cell surfaces**

160 Cleavage of the HIV-1 Env precursor affects its antigenicity (73-79). The recognition of  
161 the uncleaved and mature HIV-1<sub>JR-FL</sub> Envs on the surface of transfected HOS cells  
162 exhibited distinct patterns for State 1-preferring bNAbs versus State 2/3-preferring  
163 pNAbs (Fig. 1A). Whereas the uncleaved Env was bound by antibodies capable of  
164 recognizing all three states, the mature Env was bound only by the potently neutralizing  
165 antibodies with State-1 preferences. The uncleaved Env apparently samples multiple  
166 conformations, but the mature Env assumes a conformation that precludes the binding  
167 of pNAbs.

168

169 The HIV-1 entry inhibitor, BMS-806, hinders transitions from State 1 and  
170 modestly increases the occupancy of State 1 by the mature, wild-type HIV-1 Env (see  
171 Table 1) (42,53,54,79,81). BMS-806 treatment or glutaraldehyde crosslinking has been  
172 shown to shift the antigenic profile of uncleaved HIV-1 Env closer to that of the cleaved  
173 Env (79,80). Incubating virions containing uncleaved Env with BMS-806 significantly  
174 enriched the low-FRET State-1 conformation, resulting in a conformational profile closer  
175 to that of the unliganded mature HIV-1 Env (Table 1) (81). We tested the effects of  
176 BMS-806 and the lysine-specific crosslinker, bis (sulfosuccinimidyl) suberate (BS3), on  
177 the antigenic profile of cleavage-defective HIV-1<sub>JR-FL</sub> Env(-) expressed on the surface of  
178 CHO cells (Fig. 1B). Treatment with BMS-806 and BS3 additively decreased Env(-)  
179 recognition by pNAbs (19b, b6, F105 and F240) and CD4-Ig, which preferentially bind  
180 Env conformations other than State 1 (45,48,54,78,81). In comparison, for the bNAbs

181 2G12, b12 and VRC01, the BMS-806/BS3-treated Env(-) was recognized at more than  
182 40% the level observed for the untreated Env(-). These results are consistent with  
183 previous studies suggesting that BMS-806 can decrease the State-2/3 occupancy of  
184 uncleaved HIV-1 Envs anchored in the viral or cell membranes (Table 1) (79,81).

185

### 186 **Purification and characterization of Env(-) trimers**

187 To investigate further the range of conformations sampled by the uncleaved HIV-1 Env,  
188 we purified full-length HIV-1<sub>JR-FL</sub> Env(-) trimers from the membranes of inducibly-  
189 expressing CHO cells (Fig. 2A and B). The CHO cells were incubated with BMS-806  
190 during Env(-) synthesis in an attempt to shift occupancy from States 2/3 to State 1.  
191 BMS-806 treatment of the Env(-)-expressing cells reduced the synthesis of sialidase-  
192 sensitive and Endoglycosidase H-resistant glycoforms that are relatively enriched in  
193 complex carbohydrates (Fig. 2C). Glycosylation analysis revealed that BMS-806  
194 treatment led to decreased complex sugar addition to the glycans modifying gp120  
195 asparagine residues 88, 156, 160, 241, 362 and 463 (Fig. 2D and E). The effects of  
196 BMS-806 on Env(-) conformation apparently influence the conversion of particular high-  
197 mannose glycans to complex carbohydrates in the Golgi.

198

199 To purify the Env(-) trimer complexes, membranes from BMS-806-treated CHO  
200 cells were incubated with saturating concentrations of BMS-806, crosslinked with BS3,  
201 and solubilized in Cymal-5. The detergent in the Env(-) glycoprotein solution was  
202 exchanged to a mixture of 4.5 mg/ml amphipol A8-35 and 0.005% Cymal-6 prior to cryo-  
203 plunging the samples in preparation for eventual cryo-electron microscopy (cryo-EM)

204 imaging. Parallel smFRET studies estimated that only 26% of detergent-solubilized  
205 Env(-) was in a low-FRET conformation consistent with State 1 (Fig. 3A). The majority  
206 (74%) of the solubilized Env(-) glycoproteins assumed high- and intermediate-FRET  
207 conformations consistent with States 2 and 3, respectively. Thus, compared with BMS-  
208 806-treated Env(-) on virions, the Env(-) glycoproteins solubilized and purified from  
209 CHO cells exhibit less State 1 and more State 2/3 conformations (Table 1).

210

211         The increased exposure of the gp120 V3 loop is a sensitive indicator of HIV-1  
212 Envs that have undergone transitions from a State-1 conformation (48,54,92-94). We  
213 tested the ability of the 19b anti-V3 antibody, which does not neutralize most primary  
214 HIV-1 strains, to precipitate the BMS-806-treated, BS3-crosslinked Env(-) trimers  
215 solubilized in Cymal-5 detergent (Fig. 3B). After successive precipitations with the 19b  
216 antibody, approximately 85% of the Env(-) glycoprotein was removed from the CHO cell  
217 lysate. Therefore, even in the presence of BMS-806 and after BS3 crosslinking, most of  
218 the Env(-) trimers solubilized in Cymal-5 detergent apparently sample non-State-1  
219 conformations. Together with the above cell-based ELISA and smFRET results, these  
220 experiments suggest that detergent solubilization destabilizes the uncleaved Env, even  
221 after BMS-806 and BS3 treatment. Therefore, the cell membrane and lipid-protein  
222 interactions may be important for the stabilization of the Env(-) State-1 conformation.

223

#### 224 **Env(-) structure determination by cryo-electron microscopy (cryo-EM)**

225 The BMS-806-treated, BS3-crosslinked HIV-1<sub>JR-FL</sub> Env(-) trimers, purified in Cymal-5  
226 and exchanged into amphipol A8-35 and Cymal-6, were analyzed by cryo-EM. We

227 collected cryo-EM data from both a 200-kV FEI Tecnai Arctica microscope without an  
228 energy filter and a 300-kV FEI Titan Krios microscope with a Gatan BioQuantum energy  
229 filter, in video frames of a super-resolution counting mode with the Gatan K2 Summit  
230 direct electron detector (Fig. 4A-F). While both 200-kV and 300-kV cryo-EM datasets  
231 gave rise to consistent results, the final reconstructions at near-atomic resolution were  
232 achieved using the 300-kV cryo-EM dataset; the 300-kV dataset incorporates single-  
233 particle data collected at a high tilt angle of the sample stage to alleviate the effect of  
234 the strong orientation preference of the Env(-) particles. By contrast, the 200-kV cryo-  
235 EM dataset, which lacks tilted data, fell short of achieving a comparable level of  
236 resolution and suffered from the orientation preference of the particle images. However,  
237 despite the modest level of resolution (5.5-8 Å), extensive 3D classification of the 200-  
238 kV dataset, as detailed in a bioRxiv preprint (95), indicated the existence of multiple  
239 Env(-) conformations, some of which are consistent with the higher-resolution  
240 reconstructions obtained from the 300-kV dataset. This paper focuses on interpreting  
241 two higher-resolution maps of the uncleaved Env(-) trimer derived from the 300-kV  
242 dataset.

243

244 Analysis of the 300-kV data resulted in two major 3D classes, herein designated  
245 State U<sub>1</sub> and State U<sub>2</sub>, respectively comprising 37% and 17% of the imaged particles,  
246 after removal of junk particles. The State-U<sub>1</sub> and State-U<sub>2</sub> maps were refined to 4.1 and  
247 4.7 Å, respectively, without imposing any symmetry during refinement and  
248 reconstruction (Fig. 4G and H). The map quality allowed atomic modelling and  
249 refinement with accuracy to the level of the C $\alpha$  backbone trace. By contrast, imposing

250 C3 symmetry during refinement and reconstruction resulted in lower resolution and  
251 poorer structural features in the refined density maps of both State-U<sub>1</sub> and State-U<sub>2</sub>,  
252 suggesting that both conformations indeed lack rigorous three-fold symmetry. Other 3D  
253 classes derived from the HIV-1<sub>JR-FL</sub> dataset were not able to be refined to comparable  
254 levels of resolution, and thus are not further analyzed and discussed herein. Curiously,  
255 no major 3D classes with rigorous three-fold symmetry were found when extensive 3D  
256 classification was conducted using the maximum-likelihood method without imposing C3  
257 symmetry (96). This likely reflects the intrinsic conformational plasticity of the Env(-)  
258 glycoprotein, although we do not rule out the contribution of preparation-dependent  
259 variables, such as asymmetric crosslinking between adjacent protomers.

260

### 261 **Key structural features of the asymmetric uncleaved HIV-1 Env trimers**

262 The U<sub>1</sub> and U<sub>2</sub> Env(-) trimers share an overall topology with existing structures of  
263 soluble and membrane HIV-1 Env trimers (97-108) (Fig. 5A). A central feature of all  
264 these structures is a 3-helix bundle (3-HB<sub>C</sub>) formed by the C-terminal portion of the  
265 gp41 HR1 region (HR1<sub>C</sub>); the gp120 subunits project outward from this central helical  
266 coiled coil. These common features allowed us to use existing symmetric and  
267 asymmetric HIV-1 Env trimer structures as references to build structural models of  
268 states U<sub>1</sub> and U<sub>2</sub>. All three individual protomers in the U<sub>1</sub> and U<sub>2</sub> trimers exhibit similar  
269 folds, with C $\alpha$  RMSD values of ~2 Å (Fig. 5B and C). While both the U<sub>1</sub> and U<sub>2</sub>  
270 conformations of Env(-) are asymmetric, they exhibit different degrees of such  
271 asymmetry in terms of the relative rotation of the individual protomers with respect to  
272 the trimer axis. The protomers are differentially translated and rotated with respect to

273 each other in unique ways in the U<sub>1</sub> and U<sub>2</sub> trimers (Fig. 5D), generating ~3-4 Å  
274 movement overall in the gp120 outer domain (OD). When one of the protomers is used  
275 to align both conformations, the other two protomers of U<sub>2</sub> are notably rotated by 2.8  
276 and 4 degrees relative to the corresponding protomers of U<sub>1</sub> (Fig. 5A). This creates the  
277 smallest and largest openings between two adjacent protomers in U<sub>2</sub>, the more  
278 asymmetric of the two Env(-) conformations. Alignment of all three protomer structures  
279 in each conformation indicates that the asymmetric conformations are facilitated by local  
280 structural rearrangements of residues 546-568 at the inter-protomer interface. This  
281 gp41 segment (HR1<sub>N</sub>) is immediately N-terminal to the central 3-HB<sub>C</sub> and exhibits the  
282 greatest local structural variation among the protomers. Notably, the overall structural  
283 variation of gp41 among the U<sub>1</sub> and U<sub>2</sub> protomers is greater than that of the gp120 core  
284 structure, presumably because gp41 contributes more interactions to the inter-protomer  
285 interface. Consistently, the gp120 trimer association domain (TAD), which includes the  
286 V1/V2 and V3 regions, exhibits greater conformational variation in U<sub>2</sub> than in U<sub>1</sub>, leading  
287 to an overall greater extent of asymmetry in U<sub>2</sub> (Fig. 5B and C). There is similarly  
288 greater gp41 structural variation among the protomers in U<sub>2</sub> than in U<sub>1</sub>.

289

### 290 **Comparison with structures of cleaved HIV-1 Env trimers**

291 We compared the U<sub>1</sub> and U<sub>2</sub> HIV-1<sub>JR-FL</sub> Env(-) structures to those of mature (cleaved)  
292 HIV-1 Env trimers. The structure of the unliganded HIV-1<sub>BG505</sub> sgp140 SOSIP.664  
293 glycoprotein (PDB: 4ZMJ) provides an example of a stabilized soluble Env trimer with  
294 C3 symmetry (104). Structures of cytoplasmic tail-deleted, detergent-solubilized HIV-  
295 1<sub>JR-FL</sub> and HIV-1<sub>AMC011</sub> EnvΔCT trimers have been solved in complex with Fab

296 fragments of the PGT151 neutralizing antibody (PDB: 5FUU and 6OLP, respectively)  
297 (105,108). Binding of the PGT151 Fabs introduces asymmetry into the Env trimer,  
298 limiting the binding stoichiometry to two Fabs per trimer.

299

300         The folds of the  $U_1$  and  $U_2$  Env(-) protomers resemble those of the sgp140  
301 SOSIP.664 and PGT151-bound Env $\Delta$ CT protomers (Fig. 6). The largest structural  
302 difference is localized in HR1<sub>N</sub> residues 534-570 leading to the central 3-HB<sub>C</sub> of gp41.  
303 When the  $U_1$  and sgp140 SOSIP.664 trimer structures are aligned using one of the  
304 protomers, the other two protomers of  $U_1$  exhibit rotations in opposite directions relative  
305 to the symmetric sgp140 SOSIP.664 trimer structure, causing a prominent narrowing of  
306 the opening angle between these two protomers in the  $U_1$  trimer structure (Fig. 6A). By  
307 contrast, when the  $U_1$  structure is aligned to the PGT151-bound Env $\Delta$ CT trimer using  
308 the protomer free of the antibody, both the other two protomers exhibit rotations in the  
309 same direction; this results in two smaller opening angles and one notably larger  
310 opening angle in comparison with those seen in the symmetric sgp140 trimer (Fig. 6B).  
311 In addition to relative rotation, the gp120 components of the  $U_1$  protomers also exhibit  
312 outward movement in both comparisons (Fig. 6A and B), giving rise to a slightly wider  
313 trimer footprint (Fig. 7A). Some local divergence in the gp120 V1/V2 region and gp41  
314  $\alpha$ 8 helix between HIV-1<sub>JR-FL</sub> Env(-) and HIV-1<sub>BG505</sub> sgp140 SOSIP.664 likely results from  
315 strain-dependent differences in primary sequence. Consistent with this explanation, the  
316 protomer structures of the Env(-) and Env $\Delta$ CT trimers, both derived from the HIV-1<sub>JR-FL</sub>  
317 strain, align well in these regions. As is the case for all current HIV-1 Env trimer

318 structures, the gp41 membrane-proximal external region (MPER) and transmembrane  
319 region are disordered in the U<sub>1</sub> and U<sub>2</sub> maps.

320

321 We next compared the topology of the Env(-) trimers to that of cleaved Env  
322 trimers. The inter-protomer distances between arbitrarily chosen atoms on the outer  
323 surface of gp120 and gp41 provide a measure of trimer geometry (Fig. 7A). Of the  
324 trimers that we compared, the symmetric HIV-1<sub>BG505</sub> sgp140 SOSIP.664 trimer is the  
325 most tightly packed, with the respective gp120 and gp41 sides 77.3 and 39.3 Å in  
326 length. The two sides of the EnvΔCT trimers bound to the PGT151 antibody Fabs are  
327 similar in length (gp120: 75.4, 77.1/gp41: 37.4, 37.4 Å and gp120: 75.5, 76.0/gp41:  
328 37.5, 37.8 Å in the HIV-1<sub>JR-FL</sub> and HIV-1<sub>AMC011</sub> EnvΔCT trimers, respectively ); these  
329 Fab-bound sides are shorter than the “opened” unliganded side (gp120: 83.6/gp41: 46.2  
330 Å and gp120: 84.8/gp41: 46.6 Å in the HIV-1<sub>JR-FL</sub> and HIV-1<sub>AMC011</sub> EnvΔCT trimers,  
331 respectively). The asymmetry of the U<sub>1</sub> Env(-) trimer is qualitatively similar to that of the  
332 U<sub>2</sub> trimer; the asymmetry of the Env(-) trimers is distinguished by three sides of  
333 different lengths and therefore differs from the asymmetry in the EnvΔCT trimers  
334 induced by the PGT151 antibody. Notably, the average lengths of the gp120/gp41  
335 sides of the Env(-) trimers are longer than those of the unliganded sgp140 SOSIP.664  
336 or PGT151-bound EnvΔCT trimers, indicating that the uncleaved Env(-) trimers are  
337 packed less tightly than the cleaved Env trimers.

338

339 **To evaluate the basis for the increased “openness” of the uncleaved Env(-)**  
340 **trimers, we compared the structures of the gp41 3-HB<sub>C</sub> coiled coil and HR1<sub>N</sub>**



341 **region in the Env(-) and cleaved Env trimers. Changes in the packing or**  
342 **orientation of the 3-HB<sub>c</sub> coiled coil could potentially influence trimer topology.**  
343 **Although it appears that the crossing angles between two adjacent helices in the**  
344 **gp41 3-HB<sub>c</sub> coiled coil are very similar in the U<sub>1</sub> and U<sub>2</sub> trimers, these 3-HB<sub>c</sub>**  
345 **helices exhibit differential packing and asymmetric features in U<sub>1</sub> and U<sub>2</sub> that are**  
346 **amplified into a greater degree of overall trimeric asymmetry. Compared to the**  
347 **PGT151-bound cleaved Env structures (PDB IDs 5FUU and 6OLP), the U<sub>1</sub>**  
348 **conformation has clearly larger crossing angles and thus a greater 3-HB<sub>c</sub> coiled-**  
349 **coil footprint (Fig. 7B). By contrast, the crossing angles in U<sub>1</sub> are nearly identical**  
350 **to those of the sgp140 SOSIP.664 trimers, but the U<sub>1</sub> 3-HB<sub>c</sub> helices exhibit marked**  
351 **translation in opposite directions that breaks the trimer symmetry seen in the**  
352 **crystal structures of the sgp140 SOSIP.664 trimers (PDB IDs 5FYK and 4ZMJ).**  
353 **Being able to sustain structural rearrangements involving both of the orthogonal**  
354 **degrees of freedom demonstrates that the Env trimer metastability and lability is**  
355 **potentially rooted in the conformational plasticity and flexibility of the central 3-**  
356 **HB<sub>c</sub> structure.**

357

358         Despite a high degree of primary sequence conservation among HIV-1 strains,  
359 the gp41 HR1<sub>N</sub> region (residues 541-570) exhibits significant conformational  
360 polymorphism among current HIV-1 Env trimer structures. In the pre-triggered (State-1)  
361 Env conformation, the gp41 HR1<sub>N</sub> region has been implicated in the non-covalent  
362 association with gp120; in the pre-hairpin intermediate (State 3), the HR1<sub>N</sub> region forms  
363 part of the extended HR1 helical coiled coil (14-16,109-111). Therefore, HR1<sub>N</sub> may

364 transition from an as-yet-unknown State-1 structure to a helical coiled coil (State 3) as  
365 Env “opens” upon binding CD4. The HR1<sub>N</sub> region is relatively disordered in most  
366 sgp140 SOSIP.664 structures, probably as a result of the I559P change used to  
367 stabilize these soluble Env trimers (112-115). Even in asymmetric structures of sgp140  
368 SOSIP.664 trimers bound to soluble CD4 and the E51 CD4-induced antibody (116),  
369 HR1<sub>N</sub> disorder precludes analysis. We therefore limited our comparison to asymmetric  
370 Env trimers for which HR1<sub>N</sub> structural information is available. Comparison of the HR1<sub>N</sub>  
371 conformation in the asymmetric Env trimers suggested that the helicity of the HR1<sub>N</sub>  
372 region is related to the degree of “openness” of the corresponding protomer (Fig. 8).  
373 **Lower helicity of the HR1<sub>N</sub> region leads to a somewhat collapsed conformation**  
374 **that is correlated with a smaller inter-protomer opening angle. This is consistent**  
375 **with the notion that a non-helical, loop-like and more collapsed HR1<sub>N</sub>, which is**  
376 **located in the crevice formed by the protomer arms, would not have sufficient**  
377 **structural strength to sustain a wider opening angle. These observations support**  
378 **the proposition that the HR1<sub>N</sub> conformation is allosterically coupled with**  
379 **asymmetric features of the 3-HB<sub>C</sub> and the overall asymmetry of the entire trimer.**

380

### 381 **Env(-) glycosylation**

382 Most of the peptide-proximal density associated with N-linked glycosylation is preserved  
383 in the U<sub>1</sub> map and was modeled (Fig. 9). Most distal glycan residues are not well  
384 resolved, reflecting their dynamic nature and heterogeneity. As has been previously  
385 shown, the high-mannose glycans are clustered in a patch on the surface of the gp120  
386 outer domain (39,40,65,117). No glycan-associated density on Asn 297 is detectable,

387 and the glycan signal on Asn 448 is weak. The signals associated with the complex  
388 glycans on gp41 residues Asn 611 and Asn 637 are buried in noise. The most  
389 membrane-proximal gp41 glycan on Asn 616 is largely modified by high-mannose  
390 glycans.

391

392 BMS-806 treatment of Env(-)-expressing cells led to a reduction in the  
393 modification of glycans on Asn 88, 156, 160, 241, 362 and 463. Asn 88 and 241 are  
394 located at the gp120-gp41 interface, and Asn 156 and 160 at the trimer apex (Fig. 9).  
395 Previous studies have suggested that BMS-806 can strengthen inter-subunit and inter-  
396 protomer interactions in the Env trimer, increasing the binding of neutralizing antibodies  
397 that recognize the gp120-gp41 interface and trimer apex (79). Strengthening these  
398 interactions may render the carbohydrates in these regions less available for  
399 modification to complex carbohydrates. Consistent with this, two other BMS-806-  
400 sensitive glycans (on Asn 362 and Asn 463) reside on the perimeter of the gp120 outer  
401 domain that, in a more closed trimer, might be sterically limited by inter-protomer  
402 effects.

403

#### 404 **BMS-806 binding site**

405 The binding site of BMS-806 in sgp140 SOSIP.664 complexes (PDB: 5U7M) has been  
406 previously characterized (118). In the Env(-) maps, density corresponding to the  
407 location of BMS-806 in the sgp140 SOSIP.664 complexes is evident. In the Env(-)  
408 complexes, BMS-806 is located in the gp120 Phe 43 cavity and the adjacent water-filled  
409 channel, sandwiched between Trp 427 and Trp 112. Although the level of resolution

410 does not allow unambiguous definition of the binding mode, the position and orientation  
411 of BMS-806 is consistent with that in the sgp140 SOSIP.664 complexes (118) (Fig. 10).  
412 In the U<sub>1</sub> Env(-)-BMS-806 structure, as in the unliganded and BMS-806-bound sgp140  
413 SOSIP.664 structures (104,118), Layer 1 of the gp120 inner domain appears to be  
414 stabilized by the insertion of Trp 69 into the back end of the Phe 43 cavity, where it  
415 interacts orthogonally with Trp 112. During the course of Env binding to CD4, Layer 1 is  
416 thought to undergo rearrangement to decrease the off-rate of CD4 (119); fixation of  
417 Layer 1 by BMS-806 could help to inhibit Env conformational transitions to the CD4-  
418 bound State 3.

419

#### 420 **Effect of BMS-806 on processing of wild-type HIV-1 Env**

421 BMS-806 and its analogues block transitions from the pre-triggered Env conformation;  
422 thus, addition of these compounds to cleaved and uncleaved Envs on virions enriches  
423 State 1 (Table 1) (42,53,54,79,81). The studies shown in Figure 2D and E suggest that  
424 limiting the conformational flexibility of the cleavage-defective Env(-) by exposing  
425 Env(-)-expressing cells to BMS-806 can influence the processing of carbohydrate  
426 structures. To evaluate more thoroughly how Env conformation influences its  
427 processing, we used A549-Gag/Env cells, which produce virus-like particles (VLPs)  
428 containing Env (72). The wild-type HIV-1<sub>AD8</sub> Env in the A549-Gag/Env cells is  
429 proteolytically processed and the VLPs contain mostly cleaved Env, as is the case for  
430 authentic HIV-1 virions (72). Therefore, the use of A549-Gag/Env cells allowed us to  
431 evaluate the effects of BMS-806 on the cleavage and glycosylation of wild-type HIV-1  
432 Env in cells and on VLPs.

433

434           We incubated A549-Gag/Env cells with BMS-806 and studied Env in cell lysates  
435 and VLPs. BMS-806 treatment during Env expression resulted in a decrease in the  
436 efficiency of Env cleavage (Fig. 11A). The uncleaved Env produced in the presence of  
437 BMS-806 was efficiently incorporated into VLPs (Fig. 11B). This contrasts with the  
438 relative exclusion of uncleaved Env from VLPs produced in the absence of BMS-806  
439 (Fig. 11B) (72). In the untreated cells, some of the glycans on the uncleaved Env are  
440 Endoglycosidase Hf-resistant and therefore are complex carbohydrates (Fig. 11A). The  
441 Endoglycosidase Hf-resistant fraction of the uncleaved Env migrated faster on SDS-  
442 polyacrylamide gels following BMS-806 treatment, indicating that fewer complex sugars  
443 are added to Env produced in A549-Gag/Env cells treated with BMS-806 (Fig. 11A).  
444 Nonetheless, in the BMS-806-treated cells, the uncleaved Env that is modified by  
445 complex glycans (and therefore has passed through the Golgi) is incorporated into  
446 VLPs (Fig. 11B). These results suggest that the BMS-806-induced reduction in the  
447 conformational flexibility of the Env precursor decreases the efficiency of gp160  
448 cleavage and addition of some complex glycans, without significantly affecting Env  
449 transport through the Golgi or incorporation into VLPs.

450

451 **DISCUSSION**

452 The uncleaved HIV-1 Env serves as a precursor to the cleaved functional Env and, by  
453 eliciting poorly neutralizing antibodies, as a potential decoy to the host immune system.  
454 Antibody or ligand binding and smFRET analyses indicate that the Env precursor can  
455 sample multiple conformations that resemble States 1, 2 and 3 of the mature viral Env  
456 spike (73-81). The conformational plasticity of the Env precursor contrasts with the  
457 behavior of the mature Env, which in the absence of ligands largely resides in State 1  
458 (42,81). Therefore, proteolytic cleavage stabilizes State-1 Env, which is highly resistant  
459 to neutralization by antibodies recognizing other Env conformations. Although  
460 proteolytic maturation also primes the membrane-fusing potential of other Class I viral  
461 membrane fusion proteins, the effects of cleavage on HIV-1 Env conformational  
462 plasticity are unusual. For example, crystal structures comparing the influenza virus  
463 precursor, HA0, with the cleaved HA1/HA2 trimer showed differences only in the  
464 immediate vicinity of the cleavage site (120). Uncleaved HIV-1 Envs can be transported  
465 from the endoplasmic reticulum to the cell surface by bypassing the Golgi or, when  
466 trafficking through the classical secretory pathway, by escaping furin cleavage in the  
467 Golgi (72). Both subsets of uncleaved Envs on the surface of expressing cells can be  
468 recognized by pNAbs and therefore represent a potentially abundant source of Env  
469 conformations other than State 1 (72,79). The resulting diversion of host antibody  
470 responses away from State-1 Env, the major target for neutralizing antibodies, would  
471 have considerable advantages for a persistent virus like HIV-1.

472

473 BMS-806 can enrich State 1 in the uncleaved membrane-anchored Env (79,81)  
474 and BS3 crosslinking could hypothetically help to stabilize this conformation.  
475 Nonetheless, once Env(-) glycoproteins were solubilized in detergent, these treatments  
476 did not prevent Env(-) from assuming non-State-1 conformations. The loss of  
477 membrane interactions (122), the effects of detergents or other manipulations during  
478 purification may have contributed to diminished State-1 occupancy in this case.

479

480 **Our structural and biophysical analyses indicate that the cleaved Env**  
481 **conformation seen in the sgp140 SOSIP.664 trimers is also sampled by the**  
482 **uncleaved Env, but notably, in an asymmetric fashion. Thus, although the**  
483 asymmetry of the U<sub>1</sub> and U<sub>2</sub> uncleaved Env trimers alters the quaternary relationships  
484 among the Env protomers, the fold of the individual Env(-) protomers resembles those  
485 of sgp140 SOSIP.664 and PGT151-bound Env $\Delta$ CT trimers. Analysis by smFRET has  
486 suggested that these Envs are predominantly in a State-2-like conformation (121). By  
487 analogy, we deduce that U<sub>1</sub> and U<sub>2</sub> represent State-2-like conformations. State 2 has  
488 been suggested to represent a default intermediate conformation favored by Envs that  
489 experience a destabilization of State 1 (48,49,54,82,121). CD4 binding to the wild-type  
490 HIV-1 Env trimer sequentially induces State-2 and State-3 conformations in the bound  
491 protomer, whereas the other, ligand-free protomers in the Env trimer assume State-2  
492 conformations (49). Although PGT151 is a broadly neutralizing antibody and can  
493 presumably interact with State-1 Envs, it induces asymmetry in the Env trimer, causing  
494 the Env protomers to assume State-2-like conformations (121). Thus, breaking

495 symmetry in the HIV-1 Env trimer often results in the adoption of a State-2  
496 conformation, consistent with the proposed default nature of this intermediate.

497

498 **Asymmetry of both uncleaved and cleaved Env trimers appears to be**  
499 **related to the structural plasticity and flexibility of the gp41 HR1<sub>N</sub> region, which is**  
500 **directly situated in the inter-protomer interface and is allosterically coupled with**  
501 **the quaternary Env conformation. On the one hand, the HR1<sub>N</sub> structure can**  
502 **directly affect the packing of the central 3-HB<sub>C</sub> coiled coils; on the other hand, the**  
503 **HR1<sub>N</sub> rigidity can allosterically regulate the inter-protomer opening angle.**  
504 **Mutagenesis studies have suggested that in the pre-triggered (State-1) Env**  
505 **conformation, the HR1<sub>N</sub> region contributes to the non-covalent association of**  
506 **gp120 with gp41 (109-111). We observed a relationship between the inter-**  
507 **protomer opening angle of asymmetric Env trimers and HR1<sub>N</sub> helicity. As initial**  
508 **CD4 binding to the Env trimer occurs asymmetrically, with State-2 conformations**  
509 **assumed by the unbound protomers (49), the HR1<sub>N</sub> regions presumably transition**  
510 **from as-yet-unknown State-1 conformations to predominantly helical**  
511 **conformations. Subsequent assembly of three HR1<sub>N</sub> helices into the extended**  
512 **gp41 coiled coil [(HR1<sub>N+C</sub>)<sub>3</sub>] projects the fusion peptide toward the target**  
513 **membrane.**

514

515 **The symmetry of the mature, pre-triggered (State-1) HIV-1 Env trimer likely**  
516 **contributes to its ability to evade pNAbs. Supporting this assertion is the**  
517 **previous observation that the fraction of cell-surface Env recognized by bNAbs**



518 **crosslinked into trimers, whereas the cell-surface Env that was recognized by**  
519 **pNAbs crosslinked into dimers and monomers, possible reflecting trimer**  
520 **asymmetry (72). The asymmetry observed for the uncleaved Env(-) U<sub>1</sub> and U<sub>2</sub>**  
521 **trimers potentially allows pNAbs to access their epitopes with minimal steric**  
522 **hindrance. Indeed, pNAbs directed against the gp120 V3 region or CD4-binding**  
523 **site can be docked into the open face of the U<sub>1</sub> Env trimer with only minimal**  
524 **readjustment of surrounding structures to remove steric clashes (data not**  
525 **shown). Maintaining C3 symmetry may be one prerequisite for preserving an**  
526 **antibody-resistant State-1 Env conformation. Our study implicates the**  
527 **conformationally labile gp41 HR1<sub>N</sub> segment in maintaining trimer symmetry, and**  
528 **the high-resolution structure of this functionally important region in a State-1-**  
529 **compatible Env conformation is a future goal.**

530

531       The intrinsic conformational heterogeneity of the uncleaved HIV-1 Env trimer and  
532 the low occupancy of certain conformational states present significant challenges to  
533 their structural characterization. Previous studies of detergent-solubilized uncleaved  
534 HIV-1 Envs with truncated cytoplasmic tails were performed without extensive 3D  
535 classification and with C3 symmetry imposed, resulting in lower-resolution structures  
536 (123,124). **Our current study takes advantage of subsequent advances in 3D**  
537 **classification in cryo-EM technology and data processing to identify two major**  
538 **classes of Env(-) trimers, both asymmetric. Cryo-EM and smFRET analyses**  
539 **support the existence of other conformations in the Env(-) preparation, but high-**  
540 **resolution reconstruction of these conformers was unsuccessful (95). Current 3D**

541 **hierarchical classification methods are prone to ignore or completely miss lowly**  
542 **populated conformational states or experience difficulties in precisely classifying**  
543 **these low-population conformations, which then leads to insufficient resolution**  
544 **for structure determination and functional interpretation (125). A more complete**  
545 **characterization of the multiple conformations assumed by the uncleaved HIV-1**  
546 **Env may require approaches better able to deal with a high degree of structural**  
547 **heterogeneity than maximum-likelihood-based 3D classification (125,126).**

548

549 BMS-806 inhibits HIV-1 entry, blocking CD4-induced transitions of the mature  
550 Env from a pre-triggered (State-1) conformation to downstream states (42,53,54,79,81).  
551 On the cell or viral membrane, uncleaved Env can respond to treatment with BMS-806  
552 by increasing the occupancy of State 1 (79,81). Consequently, BMS-806 decreases  
553 recognition of uncleaved Env by pNAbs, whereas recognition by most bNAbs is  
554 maintained or increased (55,79). We found that BMS-806 also exerts a significant  
555 effect on Env during its maturation. BMS-806 treatment of cells expressing wild-type  
556 HIV-1 Env resulted in decreases in both gp160 cleavage and modification by complex  
557 carbohydrate structures; transport through the Golgi and incorporation into VLPs were  
558 not apparently blocked by BMS-806. These observations imply that gp160  
559 conformational flexibility contributes to the efficiency with which the Env precursor is  
560 acted upon by furin and glycosylation enzymes. The requirement that functional Env is  
561 cleaved (25,127) therefore provides selective pressure to maintain flexibility in the HIV-1  
562 Env precursor. The resulting conformational heterogeneity of the Env precursor  
563 represents a potential advantage for a persistent virus like HIV-1 by skewing host

564 antibody responses away from State 1. For immunization strategies employing  
565 membrane-anchored HIV-1 Env or during natural HIV-1 infection, treatment with BMS-  
566 806 analogues could potentially increase the presentation of the State-1 Env  
567 conformation to the immune system. BMS-806 analogues (79) could also assist future  
568 investigation of State-1-like conformations of uncleaved and cleaved HIV-1 Env trimers.  
569

570

## 571 **MATERIALS AND METHODS**

572 **Protein expression and purification.** For expression of the uncleaved full-length  
573 membrane-anchored HIV-1<sub>JR-FL</sub> Env(-) glycoprotein, the *env* cDNA was codon-optimized  
574 and was cloned into an HIV-1-based lentiviral vector. These Env sequences contain a  
575 heterologous signal sequence from CD5 in place of that of wild-type HIV-1 Env. The  
576 proteolytic cleavage site between gp120 and gp41 was altered, substituting two serine  
577 residues for Arg 508 and Arg 511. In the HIV-1<sub>JR-FL</sub> Env(-) glycoprotein, the amino acid  
578 sequence LVPRGS-(His)<sub>6</sub> was added to the C-terminus of the cytoplasmic tail. For  
579 Env(-) expression, the *env* coding sequences were cloned immediately downstream of  
580 the tetracycline (Tet)-responsive element (TRE). Our expression strategy further  
581 incorporated an internal ribosomal entry site (IRES) and a contiguous puromycin (puro)  
582 T2A enhanced green fluorescent protein (EGFP) open reading frame downstream  
583 of *env* (TRE-*env*-IRES-puro.T2A.EGFP). Uncleaved membrane-anchored Env(-) was  
584 produced by exogenous expression in CHO cells. Briefly, the HIV-1-based lentiviral  
585 vector encoding HIV-1<sub>JR-FL</sub> Env(-) was packaged, pseudotyped with the vesicular  
586 stomatitis virus (VSV) G protein, and used to transduce CHO cells (Invitrogen)

587 constitutively expressing the reverse Tet transactivator (rtTA). High-producer clonal cell  
588 lines were derived using a FACS Aria cell sorter (BD Biosciences) to isolate individual  
589 cells expressing high levels of EGFP. The integrity of the recombinant *env* sequence in  
590 the clonal lines was confirmed by sequence analysis of PCR amplicons. Clonal cultures  
591 were adapted for growth in a serum-free suspension culture medium (CDM4CHO;  
592 Thermo Fisher).

593

594 For the exogenous production of the Env(-) glycoprotein, cells were expanded in  
595 a suspension culture using a roller bottle system (Thermo) and were treated with 1  
596 µg/ml of doxycycline and 10 µM BMS-378806 (herein referred to as BMS-806)  
597 (Selleckchem) after reaching a density of  $>4 \times 10^6$  cells per ml. After 18 to 24 h of  
598 culture with doxycycline and BMS-806, the cells were harvested by centrifugation.  
599 During the remainder of the purification procedure, 10 µM BMS-806 was added to all  
600 buffers. The cell pellets were homogenized in a homogenization buffer (250 mM  
601 sucrose, 10 mM Tris-HCl [pH 7.4], and a cocktail of protease inhibitors [Roche  
602 Complete EDTA-free tablets]). Membranes were then extracted from the homogenates  
603 by ultracentrifugation. The extracted crude membrane pellet was collected,  
604 resuspended in 1×PBS to a final concentration of 5 mg of wet membrane per ml of  
605 1×PBS and crosslinked with 5 mM BS3 (Proteochem), followed by solubilization with a  
606 solubilization buffer containing 100 mM  $(\text{NH}_4)_2\text{SO}_4$ , 20 mM Tris-HCl (pH 8.0), 300 mM  
607 NaCl, 20 mM imidazole, 1% (wt/vol) Cymal-5 (Anatrace), and a cocktail of protease  
608 inhibitors (Roche Complete EDTA-free tablets). The suspension was ultracentrifuged for  
609 30 min at  $100,000 \times g$  and 4°C. The supernatant was collected and was mixed with a

610 small volume of preequilibrated Ni-nitrilotriacetic acid (NTA) beads (Qiagen) for 2 h on a  
611 rocking platform at 4°C. The mixture was then injected into a small column and washed  
612 with a buffer containing 20 mM Tris-HCl (pH 8.0), 100 mM (NH<sub>4</sub>)<sub>2</sub>SO<sub>4</sub>, 1 M NaCl, 30 mM  
613 imidazole, and 0.5% Cymal-5. The beads were resuspended in a buffer containing 20  
614 mM Tris-HCl (pH 8.0), 100 mM (NH<sub>4</sub>)<sub>2</sub>SO<sub>4</sub>, 250 mM NaCl, 4.5 mg/ml Amphipol A8-35  
615 (Anatrace), 0.006% DMNG (Anatrace) and a cocktail of protease inhibitors (Roche  
616 Complete EDTA-free tablets), and incubated for 2 hours on a rocking platform. The  
617 mixture was applied to a column and the buffer was allowed to flow through. The beads  
618 were then resuspended in a buffer containing 20 mM Tris-HCl (pH 8.0), 100 mM  
619 (NH<sub>4</sub>)<sub>2</sub>SO<sub>4</sub>, 250 mM NaCl, 4.5 mg/ml Amphipol A8-35 (Anatrace) and a cocktail of  
620 protease inhibitors (Roche Complete EDTA-free tablets), and incubated for 2 hours on a  
621 rocking platform. The mixture was added to a column and the buffer allowed to flow  
622 through, followed by washing with 10 bed volumes of a buffer containing 20 mM Tris-  
623 HCl (pH 8.0), 100 mM (NH<sub>4</sub>)<sub>2</sub>SO<sub>4</sub>, and 250 mM NaCl. Proteins were eluted from the  
624 bead-filled column with a buffer containing 20 mM Tris-HCl (pH 8.0), 100 mM  
625 (NH<sub>4</sub>)<sub>2</sub>SO<sub>4</sub>, 250 mM NaCl, and 250 mM imidazole. The buffer of the eluted Env(-)  
626 glycoprotein solution was exchanged with imaging buffer containing 20 mM Tris-HCl  
627 (pH 8.0), 100 mM (NH<sub>4</sub>)<sub>2</sub>SO<sub>4</sub>, and 250 mM NaCl with a Centrifugal Filter (Millipore), and  
628 was concentrated. Before cryo-plunging, Cymal-6 (Anatrace) was added to the Env(-)  
629 glycoprotein solution at a final concentration of 0.005%.

630

631 **Expression of wild-type HIV-1 Env and virus-like particles (VLPs).** Human A549  
632 lung epithelial cells (ATCC) inducibly expressing Env and an HIV-1 Gag-mCherry fusion

633 protein under the control of a tetracycline-regulated promoter were established as  
634 described (72). Briefly, A549-rtTA cells constitutively expressing the reverse tet  
635 transactivator were transduced with an HIV-1-based lentivirus vector expressing Rev  
636 and Env from HIV-1<sub>AD8</sub>, a primary HIV-1 strain (128). These A549-Env cells were  
637 transduced with a lentivirus vector expressing the HIV-1 Gag precursor fused with  
638 mCherry (72). The doxycycline-regulated expression of the Gag-mCherry fusion protein  
639 resulted in the release of Env-containing VLPs into the medium. Herein, we designate  
640 these cells A549-Gag/Env. The A549-Gag/Env cells were grown in DMEM/F12  
641 supplemented with 10% FBS, L-glutamine and penicillin-streptomycin.

642

643 **Antibodies.** Antibodies against HIV-1 Env were kindly supplied by Dr. Dennis Burton  
644 (Scripps), Drs. Peter Kwong and John Mascola (Vaccine Research Center, NIH), Dr.  
645 Barton Haynes (Duke), Dr. Hermann Katinger (Polymun), Dr. James Robinson (Tulane)  
646 and Dr. Marshall Posner (Mount Sinai Medical Center). In some cases, anti-Env  
647 antibodies were obtained through the NIH AIDS Reagent Program. Antibodies for  
648 Western blotting include goat anti-gp120 polyclonal antibody (ThermoFisher) and the  
649 4E10 human anti-gp41 antibody (Polymun). An HRP-conjugated goat anti-human IgG  
650 (Santa Cruz) and an HRP-conjugated goat anti-rabbit antibody (Santa Cruz) were used  
651 as secondary antibodies for Western blotting.

652

653 **Single-molecule FRET: sample preparation, data acquisition and analysis.**

654 Analysis of the conformational dynamics of HIV-1 Env was performed after enzymatic  
655 labeling of the V1 and V4 regions of gp120 on the purified (His)<sub>6</sub>-tagged HIV-1<sub>JR-FL</sub>

656 Env(-) glycoprotein with Cy3 and Cy5 fluorophores, respectively, as previously  
657 described (42). A transfection ratio of 20:1 of non-tagged: V1/V4-tagged HIV-1<sub>JR-FL</sub>  
658 Env(-) was used to ensure that only one protomer within a trimer carries enzymatic tags  
659 for site-specific labeling. The HIV-1<sub>JR-FL</sub> Env(-) glycoprotein was purified from transiently  
660 expressing 293T cells that had been treated with BMS-806 and crosslinked with BS3,  
661 as described above. The purified HIV-1<sub>JR-FL</sub> Env(-) glycoprotein in buffer (20 mM Tris-  
662 HCl (pH 8.0), 10 mM MgCl<sub>2</sub>, 10 mM CaCl<sub>2</sub>, 100 mM (NH<sub>4</sub>)<sub>2</sub>SO<sub>4</sub>, 250 mM NaCl, 0.005%  
663 Cymal-6, 10 μM BMS-806) was labeled with Cy3B(3S)-cadaverine (0.5 μM),  
664 transglutaminase (0.65 μM; Sigma Aldrich), LD650-CoA (0.5 μM) (Lumidyne  
665 Technologies), and AcpS (5 μM) at room temperature overnight. After labeling, Env(-)  
666 trimers were purified using Zeba™ spin desalting columns (ThermoFisher) to remove  
667 free dyes. Finally, prior to imaging, fluorescence-labeled HIV-1<sub>JR-FL</sub> Env(-) carrying the  
668 (His)<sub>6</sub> epitope tag was incubated with biotin-conjugated anti-(His)<sub>6</sub> tag antibody (HIS.H8,  
669 Invitrogen) at 4° for two hours.

670

671 All smFRET data were acquired on a home-built total internal reflection  
672 fluorescence (TIRF) microscope, as previously described (42,129). Fluorescently  
673 labeled HIV-1<sub>JR-FL</sub> Env(-) trimers were immobilized on passivated streptavidin-coated  
674 quartz microscopy slides and washed with pre-imaging buffer specifically made for this  
675 experiment. The pre-imaging buffer consisted of 20 mM Tris HCl (pH 8.0), 100 mM  
676 (NH<sub>4</sub>)<sub>2</sub>SO<sub>4</sub>, 250 mM NaCl, 0.005% Cymal-6, and 10 μM BMS-806. For smFRET  
677 analysis, a cocktail of triplet-state quenchers and 2 mM protocatechuic acid (PCA) with  
678 8 nM protocatechuic 3,4-dioxygenase (PCD) were added to the above pre-imaging

679 buffer to remove molecular oxygen. Cy3 and Cy5 fluorescence was detected with a 60x  
680 water-immersion objective (Nikon), split by a dichroic mirror (Chroma), and imaged  
681 on two synchronized ORCA-Flash4.0v2 sCMOS cameras (Hamamatsu) at 40  
682 frames/seconds for 80 seconds.

683

684 smFRET data analysis was performed on the customized Matlab (Mathworks)  
685 program SPARTAN (129). Fluorescence intensity trajectories were extracted from  
686 recorded movies, and FRET efficiency (FRET) was calculated based on  $FRET =$   
687  $I_A / (\gamma I_D + I_A)$ , where  $I_D$  and  $I_A$  are the fluorescence intensities of donor (D) and acceptor  
688 (A), respectively, and  $\gamma$  is the correlation coefficient, which incorporates the difference in  
689 quantum yields of donor and acceptor and detection efficiencies of the donor and  
690 acceptor channels. FRET trajectories were further compiled into a FRET histogram,  
691 which provides information about the distribution of Env(-) molecules among the  
692 conformational states. The state distributions in the FRET histogram were then fitted to  
693 the sum of three Gaussian distributions (based on previously identified FRET  
694 trajectories) (42,81,121) in Matlab, and the occupancy of each state was further  
695 obtained from the area under each Gaussian distribution.

696

697 **Immunoprecipitation of cell-surface Env.** One day prior to transfection, HOS cells  
698 were seeded in 6-well plates ( $6 \times 10^5$  cells/well). The cells were transfected the next day  
699 with 0.4  $\mu\text{g}$  of the pSVIIIenv plasmid expressing the wild-type HIV-1<sub>JR-FL</sub> Env and 0.05  
700  $\mu\text{g}$  of a Tat-expressing plasmid. Two days later, the cells were washed twice with  
701 blocking buffer (1 $\times$ PBS with 5% FBS) and then incubated for 1 hour at 4°C with 6  $\mu\text{g}/\mu\text{l}$



702 anti-gp120 monoclonal antibody. Cells were then washed four times with blocking  
703 buffer, four times with washing buffer (140 mM NaCl, 1.8 mM CaCl<sub>2</sub>, 1 mM MgCl<sub>2</sub> and  
704 20 mM Tris, pH 7.5), and lysed in NP-40 buffer (0.5 % NP-40, 0.5 M NaCl and 10 mM  
705 Tris, pH 7.5) for 5 min at 4°C with gentle agitation. Lysates were cleared by  
706 centrifugation at 15,000 x g for 30 min at 4°C. Antibody-bound Env was precipitated  
707 using Protein A-Sepharose beads and analyzed by SDS-PAGE and Western blotting  
708 with a horseradish peroxidase (HRP)-conjugated rabbit anti-gp120 polyclonal serum.

709

710 **Cell-based enzyme-linked immunosorbent assay (ELISA).** CHO cells expressing  
711 HIV-1<sub>JR-FL</sub> Env(-) were induced with 1 µg/ml doxycycline with or without 10 µM BMS-  
712 806. Fifteen to twenty-four hours later, the cells were washed twice with washing buffer  
713 #1 (20 mM Hepes, pH 7.5, 1.8 mM CaCl<sub>2</sub>, 1 mM MgCl<sub>2</sub>, 140 mM NaCl), and crosslinked  
714 with 5 mM BS3 or incubated in buffer without crosslinker. Forty-five minutes later, the  
715 cells were quenched with quench buffer (50 mM Tris, pH 8.0, 1.8 mM CaCl<sub>2</sub>, 1 mM  
716 MgCl<sub>2</sub>, 140 mM NaCl). The cells were blocked with a blocking buffer (35 mg/ml BSA, 10  
717 mg/ml non-fat dry milk, 1.8 mM CaCl<sub>2</sub>, 1 mM MgCl<sub>2</sub>, 25 mM Tris, pH 7.5 and 140 mM  
718 NaCl) and incubated with the indicated primary antibody in blocking buffer for 30 min at  
719 37°C. Cells were then washed three times with blocking buffer and three times with  
720 washing buffer #2 (140 mM NaCl, 1.8 mM CaCl<sub>2</sub>, 1 mM MgCl<sub>2</sub> and 20 mM Tris, pH 7.5)  
721 and re-blocked with the blocking buffer. A horseradish peroxidase (HRP)-conjugated  
722 antibody specific for the Fc region of human IgG was then incubated with the samples  
723 for 45 min at room temperature. Cells were washed three times with blocking buffer  
724 and three times with washing buffer #2. HRP enzyme activity was determined after

725 addition of 35  $\mu$ l per well of a 1:1 mix of Western Lightning oxidizing and luminal  
726 reagents (Perkin Elmer Life Sciences) supplemented with 150 mM NaCl. Light  
727 emission was measured with a Mithras LB940 luminometer (Berthold Technologies).

728

729 **Analysis of Env(-) glycoforms in BMS-806-treated cells.** CHO cells expressing HIV-  
730 1<sub>JR-FL</sub> Env(-) were treated with 1  $\mu$ M BMS-806 or an equivalent volume of the carrier,  
731 DMSO. After 18-24 h of culture, the cells were harvested and lysed in homogenization  
732 buffer (see above) and treated with different glycosidases following the manufacturer's  
733 instructions. The lysates were analyzed by Western blotting with a horseradish  
734 peroxidase (HRP)-conjugated anti-HIV-1 gp120 antibody, as described above.

735

736 **Analysis of Env glycopeptides.** The sample preparation and mass spectrometric  
737 analysis of Env(-) glycopeptides has been described previously (39,40), and no  
738 changes were made to the procedure for the current analysis. Briefly, the Env(-)  
739 glycoprotein was denatured with urea, reduced with TCEP, alkylated with  
740 iodoacetamide, and quenched with dithiothreitol. The protein was then buffer  
741 exchanged, digested with trypsin alone or with a combination of trypsin and  
742 chymotrypsin, generating glycopeptides.

743

744 The glycopeptides were analyzed by LC-MS on an LTQ-Orbitrap Velos Pro  
745 (Thermo Scientific) mass spectrometer equipped with ETD (electron transfer  
746 dissociation) that was coupled to an Acquity Ultra Performance Liquid Chromatography  
747 (UPLC) system (Waters). About 35 micromoles of digest was separated by reverse

748 phase HPLC using a multistep gradient, on a C18 PepMap™ 300 column. The mass  
749 spectrometric analysis was performed using data-dependent scanning, alternating a  
750 high-resolution scan (30,000 at m/z 400), followed by ETD and collision-induced  
751 dissociation (CID) data of the five most intense ions. The glycopeptides were identified  
752 in the raw data files using a combination of freely available glycopeptide analysis  
753 software and expert identification, as described previously (39).

754

755 **Analysis of A549-Gag/Env cells and VLPs treated with BMS-806.** To analyze the  
756 effect of BMS-806 on the processing of the wild-type HIV-1<sub>AD8</sub> Env, 150-mm dishes of  
757 30-40% confluent A549-Gag/Env cells were seeded and, on the following day, treated  
758 with 2 µg/ml doxycycline. At the same time, 10 µM BMS-806 was added.  
759 Approximately 72 hours after induction, cell lysates and medium were harvested. To  
760 prepare VLPs, the culture medium was cleared by low-speed centrifugation (500 x g for  
761 15 minutes at 4°C) and 0.45-µm filtration. VLPs were pelleted by centrifugation at  
762 100,000 x g for one hour at 4°C. The resuspended VLP preparation was clarified by  
763 low-speed centrifugation.

764

765 Env solubilized from cell lysates and VLPs was denatured by boiling in  
766 denaturing buffer (New England Biolabs) for 10 minutes. Samples were mock-treated  
767 or treated with PNGaseF or Endo Hf (New England Biolabs) for 1.5 hours according to  
768 the manufacturer's protocol. The treated samples were then analyzed by reducing  
769 SDS-PAGE and Western blotting.

770

771 **Cryo-EM sample preparation.** A 3- $\mu$ l drop of 0.3 mg/ml Env(-) protein solution was  
772 applied to a glow-discharged C-flat grid (R1/1 and R1.2/1.3, 400 Mesh, Protochips, CA,  
773 USA), blotted for 2 sec, then plunged into liquid ethane and flash-frozen using an FEI  
774 Vitrobot Mark IV.

775

776 **Cryo-EM data collection.** Cryo-EM grids were first visually screened on a Tecnai  
777 Arctica transmission electron microscope (FEI) operating at 200 kV. Qualified grids  
778 were then imaged in a 200-kV FEI Tecnai Arctica microscope, equipped with an  
779 Autoloader, at a nominal magnification of 210,000 times, and in a 300-kV Titan Krios  
780 electron microscope (FEI) equipped with a Gatan BioQuantum energy filter, at a  
781 nominal magnification of 105,000 times, operating at 300 kV. Coma-free alignment and  
782 astigmatism were manually optimized prior to data collection. Cryo-EM data from the  
783 200-kV Arctica microscope were collected semi-automatically by Legion version 3.1  
784 (130,131) on the Gatan K2 Summit direct electron detector camera (Gatan Inc., CA,  
785 USA) in a super-resolution counting mode, with a dose rate of 8 electrons/pixel/second  
786 and an accumulated dose of 50 electrons/ $\text{\AA}^2$  over 38 frames per movie. The calibrated  
787 physical pixel size and the super-resolution pixel size were 1.52  $\text{\AA}$  and 0.76  $\text{\AA}$ ,  
788 respectively. The defocus for data collection was set in the range of -1.0 to -3.0  $\mu$ m. A  
789 total of 12,440 movies were collected on the 200-kV Arctica microscope without tilting  
790 the stage, from which 10,299 movies were selected for further data analysis after  
791 screening and inspection of data quality.

792

793 Cryo-EM data from the 300-kV Krios microscope, including both zero-tilted and  
794 45°-tilted images, were collected on the K2 Summit direct electron detector (Gatan) at a  
795 pixel size of 0.685 Å in a super-resolution counting mode, with an accumulated dose of  
796 ~53 electrons/Å<sup>2</sup> across 40 frames per movie. With defocus ranging from -1.0 to -2.7  
797 µm, a total of 10,929 movies were acquired across three sessions.

798

799 Zero-tilted and 45°-tilted images were collected by a semi-automatic process set  
800 up in Serial EM (132), which is compatible with customized scripts. For the collection of  
801 zero-tilted movies, the process normally involved the following steps: Square selection  
802 and focusing, hole selection, serial local focusing and data acquisition. In the final step,  
803 precise adjustment of the defocus was conducted each time before recording movies for  
804 a new group of holes. However, for the collection of tilted movies, precise adjustment of  
805 the defocus was performed for all holes in the first place, followed by an extra  
806 coordinate transformation for the x-axis and y-axis. Tilted movies were then recorded  
807 serially with the new defocus and coordinates.

808

809 **Cryo-EM data processing and analysis.** The raw movie frames of each dataset were  
810 first corrected for their gain reference and each movie was used to generate a  
811 micrograph that was corrected for sample movement and drift with the MotionCor2  
812 program (133) at a super-resolution pixel size (0.76 Å for the 200-kV dataset, 0.685 Å  
813 for the 300-kV dataset). These drift-corrected micrographs were used for the  
814 determination of the actual defocus of each micrograph with the CTFFind4 (134) and

815 Gctf (135) programs. Icy or damaged micrographs were removed through manual per-  
816 image screening.

817

818 For the 200-kV dataset, using DeepEM, a deep learning-based particle extraction  
819 program that we developed (136), 1,436,424 particles of Env(-) were automatically  
820 selected in a template-free fashion. All 2D and 3D classifications were done at a pixel  
821 size of 1.52 Å. After the first round of reference-free 2D classification, bad particles were  
822 rejected upon inspection of class-average quality, which left 1,366,095 particles. The  
823 initial model, low-pass filtered to 60 Å, was used as the input reference to conduct  
824 unsupervised 3D classification into 5 classes with C3 symmetry, using an angular  
825 sampling of 7.5° and a regularization parameter T of 4. Iterative 3D classification in  
826 RELION (137) and ROME (138) resulted in a 3D class of 121,979 particles that reached  
827 a resolution of 5.5 Å (gold-standard FSC at 0.143 cutoff) after refinement, with  
828 imposition of C3 symmetry. More details of this preliminary, intermediate analysis were  
829 described in an online bioRxiv preprint (95).

830

831 For the zero-tilt 300-kV dataset, micrographs without dose-weighting were used  
832 by Gctf (135) to estimate the global CTF parameters; for the 45°-tilt dataset, particles  
833 were first picked by a program based on a VGG deep neural network improved from the  
834 DeepEM algorithm design (136). The coordinates were then applied for local CTF  
835 estimation in Gctf (135). We found that for most of 45°-tilted micrographs, limiting the  
836 resolution range used for CTF determination in Fourier space improved the accuracy of  
837 the resulting CTF parameters. This was realized by including the variables “local\_resL”

838 and “local\_resH” in the Gctf (135) command. Automatic picking followed by manual  
839 examination yielded 1,941,541 particles of the HIV-1<sub>JR-FL</sub> Env(-) trimers, with 785,844  
840 zero-tilted and 1,155,697 tilted particles.

841  
842 All 2D and 3D classifications of the particles from the 300-kV datasets were  
843 conducted with dose-weighted micrographs generated by MotionCor2 (133). Particles  
844 were stacked at 2.74 Å/pixel using a box size of 84\*84 for initial sorting. Two rounds of  
845 reference-free 2D classification were performed in RELION 3.0 (137), followed by one  
846 round in ROME (138), which combines maximum likelihood-based image alignment and  
847 statistical manifold learning-based classification. Bad particles were rejected upon  
848 inspection of the class average’s quality after each round of 2D classification, leaving  
849 572,205 particles for 3D refinement. The initial model was generated in RELION 3.0  
850 (137) using particles from diversely oriented 2D classes, and was low-pass filtered to 60  
851 Å.

852  
853 3D classification and refinement of the 300-kV dataset were performed in  
854 RELION 3.0 (137), as summarized in Table 3. In the first round of unsupervised 3D  
855 classification, the Healpix order was enhanced from 2 to 3 at the 20th iteration. To  
856 prevent tilted particles from being separated as a sole 3D class, the resolution limit to  
857 restrict the probability calculation was set at 15 Å in the preceding 20 iterations and 10  
858 Å in the posterior iterations. The 2nd round of 3D classification retained the same  
859 parameters except that K (the number of classes) was changed to 6. The 3rd round of  
860 3D classification was performed by local searching ( $\sigma=4$ , meaning that the standard

861 deviation of the Euler angles equals 4 times the Healpix order) to discard amorphous  
862 particles. Particles with the correct size and detailed secondary structures were selected  
863 and binned two-fold into 1.37 Å/pixel for further refinement. The selected 278,582  
864 particles were first aligned together by auto-refinement, and then were classified into 12  
865 classes within a soft, global mask without alignment. Particles from 5 classes with  
866 complete domain constitution were sorted out and used for per-particle CTF refinement  
867 in RELION 3.0 (137). Imposed with updated CTF correction, the sorted stacks were  
868 classified with local searching into two major classes.

869

870 As observed in Chimera (139), the distribution of particles concentrated in the  
871 top-view orientation for both maps, leading to anisotropy of the final resolution.  
872 Therefore, we retrieved the tilt-view particles excluded by previous rounds of 3D  
873 classification, and combined them with particles from the two classes. This was  
874 accomplished by several rounds of screening satisfying classes from the results of deep  
875 2D classification in ROME (138). The new particle dataset, containing 171,342 zero-  
876 tilted particles and 157,607 45°-tilted particles, was used for one round of 3D  
877 classification under global searching with Healpix order 2. Particles from 3 of the 4  
878 classes were identified as HIV-1<sub>JR-FL</sub> Env(-) trimers with improved isotropic resolution;  
879 these 284,664 particles were combined for the next round of 3D classification. Another  
880 round of 3D classification using the same parameters except for K=3 was performed to  
881 exclude particles with poor quality. The principal class consisting of 92% of this round's  
882 particles was reserved.

883



884 For elaborate 3D classification, we adopted a hierarchical enhancement of  
885 Healpix order in the next 9 rounds (Table 3): Sorted particles from the previous round of  
886 3D classification were used for auto-refinement followed by classification into four  
887 classes with local searching under a Healpix order of 4. In every round, this process  
888 produced a major class consistent with the structure of the conventional Env trimer and  
889 consisting of more than 80% of the input particles, while the other classes appeared in  
890 incomplete form. Therefore, this major class of particles was used for auto-refinement  
891 and was chosen as input for next round of 3D classification. This classification-  
892 selection-refinement-classification process was iterated four times, using different K  
893 (class number) values and the same Healpix order 4, until the result demonstrated more  
894 than one principal class. C1 symmetry was imposed throughout all these unsupervised  
895 3D classifications. In the last two rounds, we enhanced the Healpix order to 5 to perform  
896 local-searching 3D classification again, and finally obtained five classes. Four of these  
897 classes, consisting of 96% of the input particles, exhibited different degrees of  
898 asymmetry. By carefully comparing their features, two classes with similar topology  
899 were designated State-U<sub>1</sub> while the other two classes were designated State-U<sub>2</sub>,  
900 containing 123,372 and 55,571 particles respectively. The last round of auto-refinement  
901 for the U<sub>1</sub> and U<sub>2</sub> datasets was done in RELION 3.0 (137), applied with a soft-edged  
902 global mask when it fell into local searching. According to the in-plane shift and Euler  
903 angles of each particle from the final refinement, we reconstructed the two half-maps of  
904 each state at a super-resolution counting mode with a pixel size of 0.685 Å. The overall  
905 masked resolutions for the reconstructed maps of State-U<sub>1</sub> and State-U<sub>2</sub> were 4.1 Å and  
906 4.7 Å respectively, measured by the gold-standard FSC at 0.143-cutoff.

907

908 **Atomic model building and refinement.** The symmetric structure of the HIV-1<sub>BG505</sub>  
909 sgp140 SOSIP.664 trimer with three BMS-806 molecules bound (PDB: 6MTJ) (118) and  
910 the asymmetric structure of the HIV-1<sub>JR-FL</sub> Env $\Delta$ CT glycoprotein bound to PGT151 Fabs  
911 (PDB: 5FUU) (105) were used as reference models to build a U<sub>1</sub> structure. The template  
912 structures were docked in Coot (140), and then main-chain and side-chain fitting was  
913 improved manually to generate the starting coordinate file. The fitting of the U<sub>1</sub> model  
914 was further improved by `real_space_refinement` with secondary structure restraints in  
915 Phenix (141). Glycans of U<sub>1</sub> were manually refined in Coot (140) with “Glycan” model,  
916 using 5FUU as a reference. The U<sub>1</sub> model was used as a whole to perform rigid-body  
917 fitting into the U<sub>2</sub> density. Structural comparison was conducted in Pymol (142) and  
918 Chimera (139). All figures of the structures were produced in Pymol (142).

919

## 920 **Accession numbers**

921 The cryo-EM reconstructions of states U<sub>1</sub> and U<sub>2</sub> reported in this paper have been  
922 deposited in the Electron Microscopy Data Bank under accession numbers EMD-XXXX  
923 and EMD-XXXX, respectively. The models of U<sub>1</sub> and U<sub>2</sub> have been deposited in the  
924 Protein Data Bank under ID codes XXXX and XXXX. The cryo-EM raw data, including  
925 the motion-corrected micrographs and the particle stacks of U<sub>1</sub> and U<sub>2</sub> used for final  
926 refinement, have been deposited into the Electron Microscopy Pilot Image Archive  
927 ([www.ebi.ac.uk/emdb/ampiar](http://www.ebi.ac.uk/emdb/ampiar)) under accession no. EMPIAR-10163.

928

## 929 **Author contributions**

930 J.S. and Y.M. conceived this study. H.Ding and J.C.K. prepared the Env(-)-expressing  
931 CHO cells and the A549-Gag/Env cells. S.Z. and R.T.S. analyzed Env(-) antigenicity  
932 and established a purification scheme for the Env(-) protein. S.Z. and W.L.W. screened  
933 the samples for optimization of cryo-EM imaging. W.L.W. conducted cryo-electron  
934 microscopy, collected all data and preprocessed the data. K.W. and S.C. performed  
935 data analysis and refined the maps. K.W., S.Z., S.C. and Y.M. built the structural  
936 models. E.P.G., S.Z. and H.Desaire analyzed the Env(-) glycans. M.L. and S.Z.  
937 conducted smFRET experiments. H.T.N. studied the effect of BMS-806 on the  
938 processing of wild-type Env. Y.M. and J.S. wrote the manuscript. All authors  
939 contributed to data analysis and manuscript preparation.

940

#### 941 **Acknowledgments**

942 This work was funded in part by NIH grants AI125093 (H. Desaire), AI93256, AI100645,  
943 AI125093, AI145547, AI127767, AI150471/GM56550 and AI124982 (J.S.), by an Intel  
944 academic grant (Y.M.), by grants from the Natural Science Foundation of Beijing  
945 Municipality grant No. Z180016/Z18J008 and the National Natural Science Foundation  
946 of China grant No. 11774012 (Y.M.), and by a gift from the late William F. McCarty-  
947 Cooper. M.L. was supported by a grant (109998-67-RKVA) from the American  
948 Foundation for AIDS Research (amfAR). The research was also supported by the Basic  
949 Research Core of the University of Alabama, Birmingham Center for AIDS Research  
950 (NIH grant AI027767). The cryo-EM experiments were performed in part at the Center  
951 for Nanoscale Systems at Harvard University, a member of the National  
952 Nanotechnology Coordinated Infrastructure Network (NNCI), which is supported by the

953 National Science Foundation under NSF award no. 1541959. The cryo-EM facility was  
954 funded through the NIH grant AI100645, Center for HIV/AIDS Vaccine Immunology and  
955 Immunogen Design (CHAVI-ID). The data processing was performed in part in the  
956 Sullivan cluster, which is supported by a gift from Mr. and Mrs. Daniel J. Sullivan, Jr.  
957

958 **Table 1. Summary of HIV-1<sub>JR-FL</sub> conformational states<sup>a</sup>**

| Env                                  | Source                       | Treatment                  | Occupancy of conformational states (%) |         |         | Reference  |
|--------------------------------------|------------------------------|----------------------------|----------------------------------------|---------|---------|------------|
|                                      |                              |                            | State 1                                | State 2 | State 3 |            |
| Wild-type HIV-1 <sub>JR-FL</sub> Env | virion                       | None                       | 50                                     | 26      | 24      | 42,81      |
|                                      |                              | BMS-806                    | 55                                     | 18      | 27      |            |
| HIV-1 <sub>JR-FL</sub> Env(-)        | virion                       | None                       | 25                                     | 42      | 33      | 81         |
|                                      |                              | BMS-806                    | 40                                     | 32      | 28      |            |
|                                      | Purified from cell membranes | BMS-806 + BS3 crosslinking | 26                                     | 37      | 37      | This study |

959

960 <sup>a</sup>The relative occupancies (%) of conformational states for the indicated sources and  
 961 treatments of HIV-1 Envs were derived from smFRET histograms. The FRET  
 962 histograms were compiled from individual smFRET traces. The state distributions in the  
 963 FRET histograms were fitted to the sum of three Gaussian distributions by hidden  
 964 Markov modeling, and the occupancy of each state obtained from the area under each  
 965 Gaussian curve.

966

967

**Table 2. Cryo-EM data collection, refinement and validation statistics**

|                                           | HIV-1 <sub>JR-FL</sub><br>Env(-) U <sub>1</sub> | HIV-1 <sub>JR-FL</sub><br>Env(-) U <sub>2</sub> |
|-------------------------------------------|-------------------------------------------------|-------------------------------------------------|
| <b>Data collection and processing</b>     |                                                 |                                                 |
| Magnification                             | 105,000                                         | 105,000                                         |
| Voltage (kV)                              | 300                                             | 300                                             |
| Electron exposure (e/Å)                   | 53                                              | 53                                              |
| Defocus range (µm)                        | -1.0 to -2.7                                    | -1.0 to -2.7                                    |
| Pixel size (Å)                            | 0.685                                           | 0.685                                           |
| Symmetry imposed                          | C1                                              | C1                                              |
| Initial particle images (no.)             | 572,205                                         | 572,205                                         |
| Final particle images (no.)               | 123,372                                         | 55,571                                          |
| Map resolution (Å)                        | 4.1                                             | 4.7                                             |
| FSC threshold                             | 0.143                                           | 0.143                                           |
| Map resolution range (Å)                  | 3.8 to 8                                        | 3.8 to 10                                       |
| <b>Refinement</b>                         |                                                 |                                                 |
| Initial model used (PDB code)             | 5FUU                                            | 5FUU                                            |
| Model resolution (Å)                      | 4.2                                             | 4.8                                             |
| FSC threshold                             | 0.143                                           | 0.143                                           |
| Model resolution range (Å)                | 3.8 to 8                                        | 3.8 to 10                                       |
| Map sharpening B factor (Å <sup>2</sup> ) | -75                                             | -75                                             |
| <b>Model composition</b>                  |                                                 |                                                 |
| Non-hydrogen atoms                        | 14070                                           | 14062                                           |
| Protein residues                          | 1776                                            | 1775                                            |
| Ligands                                   | 3                                               | 3                                               |
| <b>B factors (Å<sup>2</sup>)</b>          |                                                 |                                                 |
| Protein                                   | 191.26                                          | 191.13                                          |
| Ligands                                   | 3.16                                            | 12.91                                           |
| <b>R.m.s. deviations</b>                  |                                                 |                                                 |
| Bond lengths (Å)                          | 0.008                                           | 0.008                                           |
| Bond angles (degree)                      | 1.455                                           | 1.204                                           |
| <b>Validation</b>                         |                                                 |                                                 |
| MolProbity score                          | 2.67                                            | 2.86                                            |
| Clashscore                                | 34.63                                           | 46.01                                           |
| Poor rotamers (%)                         | 0.18                                            | 1.78                                            |
| <b>Ramachandran plot</b>                  |                                                 |                                                 |
| Favored (%)                               | 85.97                                           | 90.65                                           |
| Allowed (%)                               | 13.75                                           | 9.06                                            |
| Disallowed (%)                            | 0.29                                            | 0.29                                            |

968

969

970 **Table 3. Summary of 3D classification parameters (300-kV dataset)**

| Iteration number            | K  | Healpix order | Global searching or local searching | Particles left for next round |
|-----------------------------|----|---------------|-------------------------------------|-------------------------------|
| 1                           | 4  | 2 & 3         | Global                              | 479,120                       |
| 2                           | 6  | 2 & 3         | Global                              | 362,017                       |
| 3                           | 8  | 4             | Local, $\sigma=4$                   | 278,582                       |
| 4                           | 12 | —             | —                                   | 271,277                       |
| 5                           | 8  | 4             | Local, $\sigma=4$                   | 243,313                       |
| <i>Retrieve and Combine</i> |    |               |                                     |                               |
| 6                           | 4  | 2 & 3         | Global                              | 284,664                       |
| 7                           | 3  | 2             | Global                              | 269,801                       |
| 8                           | 4  | 2             | Global                              | 265,901                       |
| 9                           | 8  | 4             | Local, $\sigma=4$                   | 229,246                       |
| 10                          | 6  | 4             | Local, $\sigma=4$                   | 223,613                       |
| 11                          | 6  | 4             | Local, $\sigma=8$                   | 211,023                       |
| 12                          | 6  | 4             | Local, $\sigma=4$                   | 164,789                       |
| 13                          | 5  | 5             | Local, $\sigma=4$                   | 156,714                       |
| 14                          | 5  | 5             | Local, $\sigma=4$                   | —                             |

971  
972  
973

974

975 **REFERENCES**

- 976 1. Wyatt R, Sodroski J. 1998. The HIV-1 envelope glycoproteins: fusogens,  
977 antigens, and immunogens. *Science* 280:1884-1888.
- 978
- 979 2. Allan JS, Coligan JE, Barin F, McLane MF, Sodroski JG, Rosen CA, Haseltine  
980 WA, Lee TH, Essex M. 1985. Major glycoprotein antigens that induce antibodies in AIDS  
981 patients are encoded by HTLV-III. *Science* 228:1091-1094.
- 982
- 983 3. Robey WG, Safai B, Oroszlan S, Arthur LO, Gonda MA, Gallo RC, Fischinger  
984 PJ. 1985. Characterization of envelope and core structural gene products of HTLV-III  
985 with sera from AIDS patients. *Science* 228:593-595.
- 986
- 987 4. Klatzmann D, Champagne E, Chamaret S, Gruest J, Guetard D, Hercend T,  
988 Gluckman JC, Montagnier L. 1984. T-lymphocyte T4 molecule behaves as the receptor  
989 for human retrovirus LAV. *Nature* 312:767-768.
- 990
- 991 5. Dalglish AG, Beverley PC, Clapham PR, Crawford DH, Greaves MF, Weiss  
992 RA. 1984. The CD4 (T4) antigen is an essential component of the receptor for the AIDS  
993 retrovirus. *Nature* 312:763-767.
- 994
- 995 6. Wu L, Gerard NP, Wyatt R, Choe H, Parolin C, Ruffing N, Borsetti A, Cardoso  
996 AA, Desjardin E, Newman W, Gerard C, Sodroski J. 1996. CD4-induced interaction of  
997 primary HIV-1 gp120 glycoproteins with the chemokine receptor CCR-5. *Nature*



998 384:179-183.

999

1000 7. Trkola A, Dragic T, Arthos J, Binley JM, Olson WC, Allaway GP, Cheng-Mayer  
1001 C, Robinson J, Maddon PJ, Moore JP. 1996. CD4-dependent, antibody-sensitive  
1002 interactions between HIV-1 and its co-receptor CCR-5. *Nature* 384:184-187.

1003

1004 8. Choe H, Farzan M, Sun Y, Sullivan N, Rollins B, Ponath PD, Wu L, Mackay CR,  
1005 LaRosa G, Newman W, Gerard N, Gerard C, Sodroski J. 1996. The beta-chemokine  
1006 receptors CCR3 and CCR5 facilitate infection by primary HIV-1 isolates. *Cell* 85:1135-  
1007 1148.

1008

1009 9. Deng H, Liu R, Ellmeier W, Choe S, Unutmaz D, Burkhart M, Di Marzio P,  
1010 Marmon S, Sutton RE, Hill CM, Davis CB, Peiper SC, Schall TJ, Littman DR, Landau  
1011 NR. 1996. Identification of a major co-receptor for primary isolates of HIV-1. *Nature*  
1012 381:661-666.

1013

1014 10. Dragic T, Litwin V, Allaway GP, Martin SR, Huang Y, Nagashima KA, Cayanan  
1015 C, Maddon PJ, Koup RA, Moore JP, Paxton WA. 1996. HIV-1 entry into CD4+ cells is  
1016 mediated by the chemokine receptor CC-CKR-5. *Nature* 381:667-673.

1017

1018 11. Doranz BJ, Rucker J, Yi Y, Smyth RJ, Samson M, Peiper SC, Parmentier M,  
1019 Collman RG, Doms RW. 1996. A dual-tropic primary HIV-1 isolate that uses fusin and  
1020 the beta-chemokine receptors CKR-5, CKR-3, and CKR-2b as fusion cofactors. *Cell*

1021 85:1149-1158.

1022

1023 12. Feng Y, Broder CC, Kennedy PE, Berger EA. 1996. HIV-1 entry cofactor:  
1024 functional cDNA cloning of a seven-transmembrane, G protein-coupled receptor.  
1025 *Science* 272:872-877.

1026

1027 13. Alkhatib G, Combadiere C, Broder CC, Feng Y, Kennedy PE, Murphy PM,  
1028 Berger EA. 1996. CC CKR5: a RANTES, MIP-1alpha, MIP-1beta receptor as a fusion  
1029 cofactor for macrophage-tropic HIV-1. *Science* 272:1955-1958.

1030

1031 14. Chan DC, Fass D, Berger JM, Kim PS. 1997. Core structure of gp41 from the  
1032 HIV envelope glycoprotein. *Cell* 89:263-273.

1033

1034 15. Weissenhorn W, Dessen A, Harrison SC, Skehel JJ, Wiley DC. 1997. Atomic  
1035 structure of the ectodomain from HIV-1 gp41. *Nature* 387:426-430.

1036

1037 16. Lu M, Blacklow SC, Kim PS. 1995. A trimeric structural domain of the HIV-1  
1038 transmembrane glycoprotein. *Nat Struct Biol* 2:1075-1082.

1039

1040 17. Karlsson Hedestam GB, Fouchier RA, Phogat S, Burton DR, Sodroski J, Wyatt  
1041 RT. 2008. The challenges of eliciting neutralizing antibodies to HIV-1 and to influenza  
1042 virus. *Nat Rev Microbiol* 6:143-155.

1043

- 1044 18. Hoxie JA. 2010. Toward an antibody-based HIV-1 vaccine. *Annu Rev Med*  
1045 61:135-152.  
1046
- 1047 19. Haynes BF, Shaw GM, Korber B, Kelsoe G, Sodroski J, Hahn BH, Borrow P,  
1048 McMichael AJ. 2016. HIV-Host interactions: implications for vaccine design. *Cell Host*  
1049 *Microbe* 19:292-303.  
1050
- 1051 20. Fauci AS. 2016. An HIV vaccine: mapping uncharted territory. *JAMA* 316:143-  
1052 144.  
1053
- 1054 21. Fennie C, Lasky LA. 1989. Model for intracellular folding of the human  
1055 immunodeficiency virus type 1 gp120. *J Virol* 63:639-646.  
1056
- 1057 22. Li Y, Luo L, Thomas DY, Kang CY. 2000. The HIV-1 Env protein signal  
1058 sequence retards its cleavage and down-regulates the glycoprotein folding. *Virology*  
1059 272:417-428.  
1060
- 1061 23. Willey RL, Bonifacino JS, Potts BJ, Martin MA, Klausner RD. 1988.  
1062 Biosynthesis, cleavage, and degradation of the human immunodeficiency virus 1  
1063 envelope glycoprotein gp160. *Proc Natl Acad Sci U S A* 85:9580-9584.  
1064
- 1065 24. Earl PL, Moss B, Doms RW. 1991. Folding, interaction with GRP78-BiP,  
1066 assembly, and transport of the human immunodeficiency virus type 1 envelope protein.

1067 J Virol 65:2047-2055.

1068

1069 25. Bosch V, Pawlita M. 1990. Mutational analysis of the human immunodeficiency  
1070 virus type 1 env gene product proteolytic cleavage site. J Virol 64:2337-2344.

1071

1072 26. Decroly E, Vandenbranden M, Ruyschaert JM, Cogniaux J, Jacob GS, Howard  
1073 SC, Marshall G, Kompelli A, Basak A, Jean F, Lazuref C, Bedannet S, Chrétien M, Day  
1074 R, Seidah NG. 1994. The convertases furin and PC1 can both cleave the human  
1075 immunodeficiency virus (HIV)-1 envelope glycoprotein gp160 into gp120 (HIV-1 SU) and  
1076 gp41 (HIV-I TM). J Biol Chem 269:12240-12247.

1077

1078 27. Fenouillet E, Gluckman JC. 1992. Immunological analysis of human  
1079 immunodeficiency virus type 1 envelope glycoprotein proteolytic cleavage. Virology  
1080 187:825-828.

1081

1082 28. Hallenberger S, Bosch V, Angliker H, Shaw E, Klenk HD, Garten W. 1992.  
1083 Inhibition of furin-mediated cleavage activation of HIV-1 glycoprotein gp160. Nature  
1084 360:358-361.

1085

1086 29. Dewar RL, Natarajan V, Vasudevachari MB, Salzman NP. 1989. Synthesis and  
1087 processing of human immunodeficiency virus type 1 envelope proteins encoded by a  
1088 recombinant human adenovirus. J Virol 63:129-136.

1089

- 1090 30. Dewar RL, Vasudevachari MB, Natarajan V, Salzman NP. 1989. Biosynthesis  
1091 and processing of human immunodeficiency virus type 1 envelope glycoproteins: effects  
1092 of monensin on glycosylation and transport. *J Virol* 63:2452-2456.  
1093
- 1094 31. Merkle RK, Helland DE, Welles JL, Shilatifard A, Haseltine WA, Cummings RD.  
1095 1991. gp160 of HIV-1 synthesized by persistently infected Molt-3 cells is terminally  
1096 glycosylated: evidence that cleavage of gp160 occurs subsequent to oligosaccharide  
1097 processing. *Arch Biochem Biophys* 290:248-257.  
1098
- 1099 32. Kantanen ML, Leinikki P, Kuismanen E. 1995. Endoproteolytic cleavage of HIV-1  
1100 gp160 envelope precursor occurs after exit from the trans-Golgi network (TGN). *Arch*  
1101 *Virol* 140:1441-1449.  
1102
- 1103 33. Pfeiffer T, Zentgraf H, Freyaldenhoven B, Bosch V. 1997. Transfer of  
1104 endoplasmic reticulum and Golgi retention signals to human immunodeficiency virus  
1105 type 1 gp160 inhibits intracellular transport and proteolytic processing of viral  
1106 glycoprotein but does not influence the cellular site of virus particle budding. *J Gen Virol*  
1107 78:1745-1753.  
1108
- 1109 34. Miranda L, Wolf J, Pichuanes S, Duke R, Franzusoff A. 1996. Isolation of the  
1110 human PC6 gene encoding the putative host protease for HIV-1 gp160 processing in  
1111 CD4+ T lymphocytes. *Proc Natl Acad Sci U S A* 93:7695-7700.  
1112

- 1113 35. Ohnishi Y, Shioda T, Nakayama K, Iwata S, Gotoh B, Hamaguchi M, Nagai Y.  
1114 1994. A furin-defective cell line is able to process correctly the gp160 of human  
1115 immunodeficiency virus type 1. *J Virol* 68:4075-4079.  
1116
- 1117 36. Stein BS, Engleman EG. 1990. Intracellular processing of the gp160 HIV-1  
1118 envelope precursor. Endoproteolytic cleavage occurs in a cis or medial compartment of  
1119 the Golgi complex. *J Biol Chem* 265:2640-2649.  
1120
- 1121 37. Pal R, Hoke GM, Sarngadharan MG. 1989. Role of oligosaccharides in the  
1122 processing and maturation of envelope glycoproteins of human immunodeficiency virus  
1123 type 1. *Proc Natl Acad Sci U S A* 86:3384-3388.  
1124
- 1125 38. Doores KJ, Bonomelli C, Harvey DJ, Vasiljevic S, Dwek RA, Burton DR, Crispin  
1126 M, Scanlan CN. 2010. Envelope glycans of immunodeficiency virions are almost entirely  
1127 oligomannose antigens. *Proc Natl Acad Sci U S A* 107:13800-13805.  
1128
- 1129 39. Go EP, Ding H, Zhang S, Ringe RP, Nicely N, Hua D, Steinbock RT, Golabek M,  
1130 Alin J, Alam SM, Cupo A, Haynes BF, Kappes JC, Moore JP, Sodroski JG, Desaire H.  
1131 2017. Glycosylation benchmark profile for HIV-1 envelope glycoprotein production  
1132 based on eleven Env trimers. *J Virol* 91:e02428-16.  
1133
- 1134 40. Go EP, Herschhorn A, Gu C, Castillo-Menendez L, Zhang S, Mao Y, Chen H,  
1135 Ding H, Wakefield JK, Hua D, Liao HX, Kappes JC, Sodroski J, Desaire H. 2015.

- 1136 Comparative analysis of the glycosylation profiles of membrane-anchored HIV-1  
1137 envelope glycoprotein trimers and soluble gp140. *J Virol* 89:8245-8257.  
1138  
1139
- 1140 41. Geyer H, Holschbach C, Hunsmann G, Schneider J. 1988. Carbohydrates of  
1141 human immunodeficiency virus. Structures of oligosaccharides linked to the envelope  
1142 glycoprotein 120. *J Biol Chem* 263:11760-11767.  
1143
- 1144 42. Munro JB, Gorman J, Ma X, Zhou Z, Arthos J, Burton DR, Koff WC, Courter JR,  
1145 Smith AB, 3rd, Kwong PD, Blanchard SC, Mothes W. 2014. Conformational dynamics of  
1146 single HIV-1 envelope trimers on the surface of native virions. *Science* 346:759-763.  
1147
- 1148 43. Fouts TR, Binley JM, Trkola A, Robinson JE, Moore JP. 1997. Neutralization of  
1149 the human immunodeficiency virus type 1 primary isolate JR-FL by human monoclonal  
1150 antibodies correlates with antibody binding to the oligomeric form of the envelope  
1151 glycoprotein complex. *J Virol* 71:2779-2785.  
1152
- 1153 44. York J, Follis KE, Trahey M, Nyambi PN, Zolla-Pazner S, Nunberg JH. 2001.  
1154 Antibody binding and neutralization of primary and T-cell line-adapted isolates of human  
1155 immunodeficiency virus type 1. *J Virol* 75:2741-2752.  
1156
- 1157 45. Haim H, Salas I, McGee K, Eichelberger N, Winter E, Pacheco B, Sodroski J.  
1158 2013. Modeling virus- and antibody-specific factors to predict human immunodeficiency

1159 virus neutralization efficiency. *Cell Host Microbe* 14:547-558.

1160

1161 46. Guttman M, Cupo A, Julien JP, Sanders RW, Wilson IA, Moore JP, Lee KK.

1162 2015. Antibody potency relates to the ability to recognize the closed, pre-fusion form of

1163 HIV Env. *Nat Commun* 6:6144.

1164

1165 47. Kwong PD, Doyle ML, Casper DJ, Cicala C, Leavitt SA, Majeed S, Steenbeke

1166 TD, Venturi M, Chaiken I, Fung M, Katinger H, Parren PW, Robinson J, Van Ryk D,

1167 Wang L, Burton DR, Freire E, Wyatt R, Sodroski J, Hendrickson WA, Arthos J. 2002.

1168 HIV-1 evades antibody-mediated neutralization through conformational masking of

1169 receptor-binding sites. *Nature* 420:678-682.

1170

1171 48. Herschhorn A, Ma X, Gu C, Ventura JD, Castillo-Menendez L, Melillo B, Terry

1172 DS, Smith AB, 3rd, Blanchard SC, Munro JB, Mothes W, Finzi A, Sodroski J. 2016.

1173 Release of gp120 restraints leads to an entry-competent intermediate state of the HIV-1

1174 envelope glycoproteins. *MBio* 7:e01598-16.

1175

1176 49. Ma X, Terry DS, Gorman J, Hong X, Zhou Z, Zhao H, Altman RB, Arthos J,

1177 Kwong PD, Blanchard SC, Mothes W, Munro JB. 2018. HIV-1 Env trimer opens through

1178 an asymmetric intermediate in which individual protomers adopt distinct conformations.

1179 *eLife* 7:e34271.

1180

1181 50. Furuta RA, Wild CT, Weng Y, Weiss CD. 1998. Capture of an early fusion-active



1182 conformation of HIV-1 gp41. *Nat Struct Biol* 5:276-279.

1183

1184 51. Koshiba T, Chan DC. 2003. The prefusogenic intermediate of HIV-1 gp41  
1185 contains exposed C-peptide regions. *J Biol Chem* 278:7573-7579.

1186

1187 52. He Y, Vassell R, Zaitseva M, Nguyen N, Yang Z, Weng Y, Weiss CD. 2003.  
1188 Peptides trap the human immunodeficiency virus type 1 envelope glycoprotein fusion  
1189 intermediate at two sites. *J Virol* 77:1666-1671.

1190

1191 53. Si Z, Madani N, Cox JM, Chruma JJ, Klein JC, Schon A, Phan N, Wang L, Biorn  
1192 AC, Cocklin S, Chaiken I, Freire E, Smith AB, 3rd, Sodroski JG. 2004. Small-molecule  
1193 inhibitors of HIV-1 entry block receptor-induced conformational changes in the viral  
1194 envelope glycoproteins. *Proc Natl Acad Sci U S A* 101:5036-5041.

1195

1196 54. Herschhorn A, Gu C, Moraca F, Ma X, Farrell M, Smith AB, 3rd, Pancera M,  
1197 Kwong PD, Schon A, Freire E, Abrams C, Blanchard SC, Mothes W, Sodroski JG. 2017.  
1198 The beta20-beta21 of gp120 is a regulatory switch for HIV-1 Env conformational  
1199 transitions. *Nat Commun* 8:1049.

1200

1201 55. Castillo-Menendez LR, Nguyen HT, Sodroski J. 2019. Conformational  
1202 differences between functional human immunodeficiency virus (HIV-1) envelope  
1203 glycoprotein trimers and stabilized soluble trimers. *J Virol* 93:e01709-18.

1204

- 1205 56. Trkola A, Dragic T, Arthos J, Binley JM, Olson WC, Allaway GP, Cheng-Mayer C,  
1206 Robinson J, Maddon PJ, Moore JP. 1996. CD4-dependent, antibody-sensitive  
1207 interactions between HIV-1 and its co-receptor CCR-5. *Nature* 384:184-187.  
1208
- 1209 57. Wu L, Gerard NP, Wyatt R, Choe H, Parolin C, Ruffing N, Borsetti A, Cardoso  
1210 AA, Desjardin E, Newman W, Gerard C, Sodroski J. 1996. CD4-induced interaction of  
1211 primary HIV-1 gp120 glycoproteins with the chemokine receptor CCR-5. *Nature*  
1212 384:179-83.  
1213
- 1214 58. Berger EA, Murphy PM, Farber JM. 1999. Chemokine receptors as HIV-1  
1215 coreceptors: roles in viral entry, tropism, and disease. *Annu Rev Immunol* 17:657-700.  
1216
- 1217 59. Ivan B, Sun Z, Subbaraman H, Friedrich N, Trkola A. 2019. CD4 occupancy  
1218 triggers sequential pre-fusion conformational states of the HIV-1 envelope trimer with  
1219 relevance for broadly neutralizing antibody activity. *PLoS Biol* 17:e3000114.  
1220
- 1221 60. Kuhmann SE, Platt EJ, Kozak SL, Kabat D. 2000. Cooperation of multiple CCR5  
1222 coreceptors is required for infections by human immunodeficiency virus type 1. *J Virol*  
1223 74:7005-7015.  
1224
- 1225 61. Melikyan GB, Markosyan RM, Hemmati H, Delmedico MK, Lambert DM, Cohen  
1226 FS. 2000. Evidence that the transition of HIV-1 gp41 into a six-helix bundle, not the  
1227 bundle configuration, induces membrane fusion. *J Cell Biol* 151:413-423.

1228

1229 62. Wilen CB, Tilton JC, Doms RW. 2012. Molecular mechanisms of HIV entry. In:  
1230 Rossmann M, Rao V (eds.), *Viral Molecular Machines. Advances in Experimental*  
1231 *Medicine and Biology*, vol 726. Springer, Boston, MA.

1232

1233 63. Kwong PD, Wyatt R, Robinson J, Sweet RW, Sodroski J, Hendrickson WA.  
1234 1998. Structure of an HIV gp120 envelope glycoprotein in complex with the CD4  
1235 receptor and a neutralizing human antibody. *Nature* 393:648-659.

1236

1237 64. Wyatt R, Kwong PD, Desjardins E, Sweet RW, Robinson J, Hendrickson WA,  
1238 Sodroski JG. 1998. The antigenic structure of the HIV gp120 envelope glycoprotein.  
1239 *Nature* 393:705-711.

1240

1241 65. Stewart-Jones GB, Soto C, Lemmin T, Chuang GY, Druz A, Kong R, Thomas  
1242 PV, Wagh K, Zhou T, Behrens AJ, Bylund T, Choi CW, Davison JR, Georgiev IS, Joyce  
1243 MG, Kwon YD, Pancera M, Taft J, Yang Y, Zhang B, Shivatare SS, Shivatare VS, Lee  
1244 CC, Wu CY, Bewley CA, Burton DR, Koff WC, Connors M, Crispin M, Baxa U, Korber  
1245 BT, Wong CH, Mascola JR, Kwong PD. 2016. Trimeric HIV-1-Env structures define  
1246 glycan shields from Clades A, B, and G. *Cell* 165:813-826.

1247

1248 66. Kuiken C, Foley B, Marx P, Wolinsky S, Leitner T, Hahn B, McCutchan F,  
1249 Korber B. HIV Sequence Compendium 2013. Los Alamos HIV Sequence Database.

1250

- 1251 67. Wei X, Decker JM, Wang S, Hui H, Kappes JC, Wu X, Salazar-Gonzalez JF,  
1252 Salazar MG, Kilby JM, Saag MS, Komarova NL, Nowak MA, Hahn BH, Kwong PD,  
1253 Shaw GM. 2003. Antibody neutralization and escape by HIV-1. *Nature* 422:307-312.  
1254
- 1255 68. Decker JM, Bibollet-Ruche F, Wei X, Wang S, Levy DN, Wang W, Delaporte E,  
1256 Peeters M, Derdeyn CA, Allen S, Hunter E, Saag MS, Hoxie JA, Hahn BH, Kwong PD,  
1257 Robinson JE, Shaw GM. 2005. Antigenic conservation and immunogenicity of the HIV  
1258 coreceptor binding site. *J Exp Med* 201:1407-1419.  
1259
- 1260 69. Alshafi N, Bakouche N, Kazemi M, Richard J, Ding S, Bhattacharyya S, Das D,  
1261 Anand SP, Prevost J, Tolbert WD, Lu H, Medjahed H, Gendron-Lepage G, Ortega  
1262 Delgado GG, Kirk S, Melillo B, Mothes W, Sodroski J, Smith AB, 3rd, Kaufmann DE, Wu  
1263 X, Pazgier M, Rouiller I, Finzi A, Munro JB. 2019. An asymmetric opening of HIV-1  
1264 envelope mediates antibody-dependent cellular cytotoxicity. *Cell Host Microbe* 25:578-  
1265 587 e5.  
1266
- 1267 70. Labrijn AF, Poignard P, Raja A, Zwick MB, Delgado K, Franti M, Binley J, Vivona  
1268 V, Grundner C, Huang CC, Venturi M, Petropoulos CJ, Wrin T, Dimitrov DS, Robinson  
1269 J, Kwong PD, Wyatt RT, Sodroski J, Burton DR. 2003. Access of antibody molecules to  
1270 the conserved coreceptor binding site on glycoprotein gp120 is sterically restricted on  
1271 primary human immunodeficiency virus type 1. *J Virol* 77:10557-10565.  
1272
- 1273 71. Moore PL, Ranchobe N, Lambson BE, Gray ES, Cave E, Abrahams MR,

- 1274 Bandawe G, Mlisana K, Abdool Karim SS, Williamson C, Morris L, CAPRISA 002 study,  
1275 NIAID Center for HIV/AIDS Vaccine Immunology (CHAVI). 2009. Limited neutralizing  
1276 antibody specificities drive neutralization escape in early HIV-1 subtype C infection.  
1277 PLoS Pathog 5:e1000598.
- 1278
- 1279 72. Zhang S, Nguyen HT, Ding H, Wang J, Zou S, Liu L, Guha D, Gabuzda D, Ho D,  
1280 Kappes JC, Sodroski J. Dual pathways of human immunodeficiency virus (HIV-1)  
1281 envelope glycoprotein trafficking modulate the selective exclusion of uncleaved  
1282 oligomers from virions. J Virol 95(3):e01369-20.
- 1283
- 1284 73. Herrera C, Klasse PJ, Michael E, Kake S, Barnes K, Kibler CW, Campbell-  
1285 Gardener L, Si Z, Sodroski J, Moore JP, Beddows S. 2005. The impact of envelope  
1286 glycoprotein cleavage on the antigenicity, infectivity, and neutralization sensitivity of  
1287 Env-pseudotyped human immunodeficiency virus type 1 particles. Virology 338:154-  
1288 172.
- 1289
- 1290 74. Pancera M, Wyatt R. 2005. Selective recognition of oligomeric HIV-1 primary  
1291 isolate envelope glycoproteins by potently neutralizing ligands requires efficient  
1292 precursor cleavage. Virology 332:145-156.
- 1293
- 1294 75. Chakrabarti BK, Pancera M, Phogat S, O'Dell S, McKee K, Guenaga J, Robinson  
1295 J, Mascola J, Wyatt RT. 2011. HIV type 1 Env precursor cleavage state affects  
1296 recognition by both neutralizing and nonneutralizing gp41 antibodies. AIDS Res Hum

1297 Retroviruses 27:877-887.

1298

1299 76. Chakrabarti BK, Walker LM, Guenaga JF, Ghobbeh A, Pognard P, Burton DR,  
1300 Wyatt RT. 2011. Direct antibody access to the HIV-1 membrane-proximal external  
1301 region positively correlates with neutralization sensitivity. *J Virol* 85:8217-8226.

1302

1303 77. Li Y, O'Dell S, Wilson R, Wu X, Schmidt SD, Hogerkorp CM, Louder MK, Longo  
1304 NS, Poulsen C, Guenaga J, Chakrabarti BK, Doria-Rose N, Roederer M, Connors M,  
1305 Mascola JR, Wyatt RT. 2012. HIV-1 neutralizing antibodies display dual recognition of  
1306 the primary and coreceptor binding sites and preferential binding to fully cleaved  
1307 envelope glycoproteins. *J Virol* 86:11231-11241.

1308

1309 78. Castillo-Menendez LR, Witt K, Espy N, Princiotta A, Madani N, Pacheco B, Finzi  
1310 A, Sodroski J. 2018. Comparison of uncleaved and mature human immunodeficiency  
1311 virus membrane envelope glycoprotein trimers. *J Virol* 92:e00277-18.

1312

1313 79. Zou S, Zhang S, Gaffney A, Ding H, Lu M, Grover JR, Farrell M, Nguyen HT,  
1314 Zhao C, Anang S, Zhao M, Mohammadi M, Blanchard SC, Abrams C, Madani N,  
1315 Mothes W, Kappes JC, Smith AB, 3rd, Sodroski J. 2020. Long-acting BMS-378806  
1316 analogues stabilize the State-1 conformation of the human immunodeficiency virus type  
1317 1 envelope glycoproteins. *J Virol* 94:e00148-20.

1318

1319 80. Haim H, Salas I, Sodroski J. 2013. Proteolytic processing of the human

- 1320 immunodeficiency virus envelope glycoprotein precursor decreases conformational  
1321 flexibility. *J Virol* 87:1884-1889.
- 1322
- 1323 81. Lu M, Ma X, Reichard N, Terry DS, Arthos J, Smith AB, 3rd, Sodroski JG,  
1324 Blanchard SC, Mothes W. 2020. Shedding-resistant HIV-1 envelope glycoproteins  
1325 adopt downstream conformations that remain responsive to conformation-preferring  
1326 ligands. *J Virol* 94:e00597-20.
- 1327
- 1328 82. Wang Q, Finzi A, Sodroski J. 2020. The Conformational States of the HIV-1  
1329 Envelope Glycoproteins. *Trends Microbiol* 28:655-667.
- 1330
- 1331 83. Wibmer CK, Bhiman JN, Gray ES, Tumba N, Abdool Karim SS, Williamson C,  
1332 Morris L, Moore PL. 2013. Viral escape from HIV-1 neutralizing antibodies drives  
1333 increased plasma neutralization breadth through sequential recognition of multiple  
1334 epitopes and immunotypes. *PLoS Pathog* 9:e1003738.
- 1335
- 1336 84. Gray ES, Taylor N, Wycuff D, Moore PL, Tomaras GD, Wibmer CK, Puren A,  
1337 DeCamp A, Gilbert PB, Wood B, Montefiori DC, Binley JM, Shaw GM, Haynes BF,  
1338 Mascola JR, Morris L. 2009. Antibody specificities associated with neutralization breadth  
1339 in plasma from human immunodeficiency virus type 1 subtype C-infected blood donors.  
1340 *J Virol* 83:8925-8937.
- 1341
- 1342 85. Sather DN, Armann J, Ching LK, Mavrantoni A, Sellhorn G, Caldwell Z, Yu X,

- 1343 Wood B, Self S, Kalams S, Stamatatos L. 2009. Factors associated with the  
1344 development of cross-reactive neutralizing antibodies during human immunodeficiency  
1345 virus type 1 infection. *J Virol* 83:757-769.
- 1346
- 1347 86. Klein F, Diskin R, Scheid JF, Gaebler C, Mouquet H, Georgiev IS, Pancera M,  
1348 Zhou T, Incesu RB, Fu BZ, Gnanapragasam PN, Oliveira TY, Seaman MS, Kwong PD,  
1349 Bjorkman PJ, Nussenzweig MC. 2013. Somatic mutations of the immunoglobulin  
1350 framework are generally required for broad and potent HIV-1 neutralization. *Cell*  
1351 153:126-138.
- 1352
- 1353 87. Walker LM, Simek MD, Priddy F, Gach JS, Wagner D, Zwick MB, Phogat SK,  
1354 Poignard P, Burton DR. 2010. A limited number of antibody specificities mediate broad  
1355 and potent serum neutralization in selected HIV-1 infected individuals. *PLoS Pathog*  
1356 6:e1001028.
- 1357
- 1358 88. Gray ES, Madiga MC, Hermanus T, Moore PL, Wibmer CK, Tumba NL, Werner  
1359 L, Mlisana K, Sibeko S, Williamson C, Abdool Karim SS, Morris L, Team CS. 2011. The  
1360 neutralization breadth of HIV-1 develops incrementally over four years and is associated  
1361 with CD4+ T cell decline and high viral load during acute infection. *J Virol* 85:4828-4840.
- 1362
- 1363 89. Corti D, Langedijk JP, Hinz A, Seaman MS, Vanzetta F, Fernandez-Rodriguez  
1364 BM, Silacci C, Pinna D, Jarrossay D, Balla-Jhagjhoorsingh S, Willems B, Zekveld MJ,  
1365 Dreja H, O'Sullivan E, Pade C, Orkin C, Jeffs SA, Montefiori DC, Davis D, Weissenhorn



1366 W, McKnight A, Heeney JL, Sallusto F, Sattentau QJ, Weiss RA, Lanzavecchia A. 2010.  
1367 Analysis of memory B cell responses and isolation of novel monoclonal antibodies with  
1368 neutralizing breadth from HIV-1-infected individuals. PLoS One 5:e8805.

1369

1370 90. Wu X, Zhou T, Zhu J, Zhang B, Georgiev I, Wang C, Chen X, Longo NS, Louder  
1371 M, McKee K, O'Dell S, Perfetto S, Schmidt SD, Shi W, Wu L, Yang Y, Yang ZY, Yang Z,  
1372 Zhang Z, Bonsignori M, Crump JA, Kapiga SH, Sam NE, Haynes BF, Simek M, Burton  
1373 DR, Koff WC, Doria-Rose NA, Connors M, Program NCS, Mullikin JC, Nabel GJ,  
1374 Roederer M, Shapiro L, Kwong PD, Mascola JR. 2011. Focused evolution of HIV-1  
1375 neutralizing antibodies revealed by structures and deep sequencing. Science 333:1593-  
1376 1602.

1377

1378 91. Hraber P, Seaman MS, Bailer RT, Mascola JR, Montefiori DC, Korber BT. 2014.  
1379 Prevalence of broadly neutralizing antibody responses during chronic HIV-1 infection.  
1380 AIDS 28:163-169.

1381

1382 92. Upadhyay C, Mayr LM, Zhang J, Kumar R, Gorny MK, Nadas A, Zolla-Pazner S,  
1383 Hioe CE. 2014. Distinct mechanisms regulate exposure of neutralizing epitopes in the  
1384 V2 and V3 loops of HIV-1 envelope. J Virol 88:12853-12865.

1385

1386 93. Zolla-Pazner S, Cohen SS, Boyd D, Kong XP, Seaman M, Nussenzweig M, Klein  
1387 F, Overbaugh J, Totrov M. 2016. Structure/function studies involving the V3 region of  
1388 the HIV-1 envelope delineate multiple factors that affect neutralization sensitivity. J Virol

1389 90:636-649.

1390

1391 94. Powell RLR, Totrov M, Itri V, Liu X, Fox A, Zolla-Pazner S. 2017. Plasticity and  
1392 epitope exposure of the HIV-1 envelope trimer. *J Virol* 91:e00410-17.

1393

1394 95. Zhang S, Wang WL, Chen S, Luy M, Go EP, Steinbock RT, Ding H, Desaire H,  
1395 Kappes JC, Sodroski J, Mao Y. 2018. Structural insights into the conformational  
1396 plasticity of the full-length trimeric HIV-1 envelope glycoprotein precursor. *bioRxiv*  
1397 doi: 10.1101/288472.

1398

1399 96. Scheres SH. 2012. RELION: Implementation of a Bayesian approach to cryo-EM  
1400 structure determination. *J Struct Biol* 180:519-30.

1401

1402 97. Julien JP, Cupo A, Sok D, Stanfield RL, Lyumkis D, Deller MC, Klasse PJ, Burton  
1403 DR, Sanders RW, Moore JP, Ward AB, Wilson IA. 2013. Crystal structure of a soluble  
1404 cleaved HIV-1 envelope trimer. *Science* 342:1477-1483.

1405

1406 98. Lyumkis D, Julien JP, de Val N, Cupo A, Potter CS, Klasse PJ, Burton DR,  
1407 Sanders RW, Moore JP, Carragher B, Wilson IA, Ward AB. 2013. Cryo-EM structure of  
1408 a fully glycosylated soluble cleaved HIV-1 envelope trimer. *Science* 342:1484-1490.

1409

1410 99. Pancera M, Zhou T, Druz A, Georgiev IS, Soto C, Gorman J, Huang J, Acharya  
1411 P, Chuang GY, Ofek G, Stewart-Jones GB, Stuckey J, Bailer RT, Joyce MG, Louder

1412 MK, Tumba N, Yang Y, Zhang B, Cohen MS, Haynes BF, Mascola JR, Morris L, Munro  
1413 JB, Blanchard SC, Mothes W, Connors M, Kwong PD. 2014. Structure and immune  
1414 recognition of trimeric pre-fusion HIV-1 Env. *Nature* 514:455-461.  
1415  
1416 100. Bartesaghi A, Merk A, Borgnia MJ, Milne JL, Subramaniam S. 2013. Prefusion  
1417 structure of trimeric HIV-1 envelope glycoprotein determined by cryo-electron  
1418 microscopy. *Nat Struct Mol Biol* 20:1352-1357.  
1419  
1420 101. Guenaga J, de Val N, Tran K, Feng Y, Satchwell K, Ward AB, Wyatt RT. 2015.  
1421 Well-ordered trimeric HIV-1 subtype B and C soluble spike mimetics generated by  
1422 negative selection display native-like properties. *PLoS Pathog* 11:e1004570.  
1423  
1424 102. Guenaga J, Dubrovskaya V, Val N, Sharma SK, Carrette B, Ward AB, Wyatt RT.  
1425 2015. Structure-guided redesign increases the propensity of HIV Env to generate highly  
1426 stable soluble trimers. *J Virol* 90:2806-2817.  
1427  
1428 103. Georgiev IS, Joyce MG, Yang Y, Sastry M, Zhang B, Baxa U, Chen RE, Druz A,  
1429 Lees CR, Narpala S, Schön A, Van Galen J, Chuang GY, Gorman J, Harned A,  
1430 Pancera M, Stewart-Jones GB, Cheng C, Freire E, McDermott AB, Mascola JR, Kwong  
1431 PD. 2015. Single-chain soluble BG505.SOSIP gp140 trimers as structural and antigenic  
1432 mimics of mature closed HIV-1 Env. *J Virol* 89:5318-5329.  
1433

- 1434 104. Kwon YD, Pancera M, Acharya P, Georgiev IS, Crooks ET, Gorman J, Joyce  
1435 MG, Guttman M, Ma X, Narpala S, Soto C, Terry DS, Yang Y, Zhou T, Ahlsen G, Bailer  
1436 RT, Chambers M, Chuang GY, Doria-Rose NA, Druz A, Hallen MA, Harned A, Kirys T,  
1437 Louder MK, O'Dell S, Ofek G, Osawa K, Prabhakaran M, Sastry M, Stewart-Jones GB,  
1438 Stuckey J, Thomas PV, Tittley T, Williams C, Zhang B, Zhao H, Zhou Z, Donald BR,  
1439 Lee LK, Zolla-Pazner S, Baxa U, Schon A, Freire E, Shapiro L, Lee KK, Arthos J, Munro  
1440 JB, Blanchard SC, Mothes W, Binley JM, McDermott AB, Mascola JR, Kwong PD.  
1441 2015. Crystal structure, conformational fixation and entry-related interactions of mature  
1442 ligand-free HIV-1 Env. *Nat Struct Mol Biol* 22:522-531.  
1443
- 1444 105. Lee JH, Ozorowski G, Ward AB. 2016. Cryo-EM structure of a native, fully  
1445 glycosylated, cleaved HIV-1 envelope trimer. *Science* 351:1043-1048.  
1446
- 1447 106. Gristick HB, von Boehmer L, West AP, Jr., Schamber M, Gazumyan A, Golijanin  
1448 J, Seaman MS, Fatkenheuer G, Klein F, Nussenzweig MC, Bjorkman PJ. 2016. Natively  
1449 glycosylated HIV-1 Env structure reveals new mode for antibody recognition of the CD4-  
1450 binding site. *Nat Struct Mol Biol* 23:906-915.  
1451
- 1452 107. Pan J, Peng H, Chen B, Harrison SC. 2020. Cryo-EM structure of full-length HIV-  
1453 1 Env bound with the Fab of antibody PG16. *J Mol Biol* 432:1158-1168.  
1454
- 1455 108. Torrents de la Pena A, Rantalainen K, Cottrell CA, Allen JD, van Gils MJ, Torres  
1456 JL, Crispin M, Sanders RW, Ward AB. 2019. Similarities and differences between native

1457 HIV-1 envelope glycoprotein trimers and stabilized soluble trimer mimetics. PLoS  
1458 Pathog 15:e1007920.  
1459  
1460 109. Pacheco B, Alshafi N, Debbeche O, Prévost J, Ding S, Chapleau JP,  
1461 Herschhorn A, Madani N, Princiotta A, Melillo B, Gu C, Zeng X, Mao Y, Smith AB 3rd,  
1462 Sodroski J, Finzi A. 2017. Residues in the gp41 ectodomain regulate HIV-1 envelope  
1463 glycoprotein conformational transitions induced by gp120-directed inhibitors. J Virol  
1464 91:e02219-16.  
1465  
1466 110. Sen J, Yan T, Wang J, Rong L, Tao L, Caffrey M. 2010. Alanine scanning  
1467 mutagenesis of HIV-1 gp41 heptad repeat 1: insight into the gp120-gp41 interaction.  
1468 Biochemistry 49:5057-5065.  
1469  
1470 111. Keller PW, Morrison O, Vassell R, Weiss CD. 2018. HIV-1 gp41 residues  
1471 modulate CD4-induced conformational changes in the envelope glycoprotein and  
1472 evolution of a relaxed conformation of gp120. J Virol 92:e00583-18.  
1473  
1474 112. Dey AK, David KB, Klasse PJ, Moore JP. 2007. Specific amino acids in the N-  
1475 terminus of the gp41 ectodomain contribute to the stabilization of a soluble, cleaved  
1476 gp140 envelope glycoprotein from human immunodeficiency virus type 1. Virology  
1477 360:199-208.  
1478

- 1479 113. Ringe RP, Sanders RW, Yasmeen A, Kim HJ, Lee JH, Cupo A, Korzun J,  
1480 Derking R, van Montfort T, Julien JP, Wilson IA, Klasse PJ, Ward AB, Moore JP. 2013.  
1481 Cleavage strongly influences whether soluble HIV-1 envelope glycoprotein trimers  
1482 adopt a native-like conformation. *Proc Natl Acad Sci U S A.* 110:18256-18261.  
1483
- 1484 114. Ringe RP, Yasmeen A, Ozorowski G, Go EP, Pritchard LK, Guttman M, Ketas  
1485 TA, Cottrell CA, Wilson IA, Sanders RW, Cupo A, Crispin M, Lee KK, Desaire H, Ward  
1486 AB, Klasse PJ, Moore JP. 2015. Influences on the design and purification of soluble,  
1487 recombinant native-like HIV-1 envelope glycoprotein trimers. *J Virol* 89:12189-12210.  
1488
- 1489 115. Ringe RP, Colin P, Torres JL, Yasmeen A, Lee WH, Cupo A, Ward AB, Klasse  
1490 PJ, Moore JP. 2019. SOS and IP modifications predominantly affect the yield but not  
1491 other properties of SOSIP.664 HIV-1 Env glycoprotein trimers. *J Virol* 94:e01521-19.  
1492
- 1493 116. Yang Z, Wang H, Liu AZ, Gristick HB, Bjorkman PJ. 2019. Asymmetric opening  
1494 of HIV-1 Env bound to CD4 and a coreceptor-mimicking antibody. *Nat Struct Mol Biol*  
1495 26:1167-1175. Erratum in: *Nat Struct Mol Biol* 2020 27:105.  
1496
- 1497 117. Pritchard LK, Vasiljevic S, Ozorowski G, Seabright GE, Cupo A, Ringe R, Kim  
1498 HJ, Sanders RW, Doores KJ, Burton DR, Wilson IA, Ward AB, Moore JP, Crispin M.  
1499 2015. Structural constraints determine the glycosylation of HIV-1 envelope trimers. *Cell*  
1500 *Rep* 11:1604-1613.  
1501

- 1502 118. Pancera M, Lai YT, Bylund T, Druz A, Narpala S, O'Dell S, Schön A, Bailer RT,  
1503 Chuang GY, Geng H, Louder MK, Rawi R, Soumana DI, Finzi A, Herschhorn A, Madani  
1504 N, Sodroski J, Freire E, Langley DR, Mascola JR, McDermott AB, Kwong PD. 2017.  
1505 Crystal structures of trimeric HIV envelope with entry inhibitors BMS-378806 and BMS-  
1506 626529. *Nat Chem Biol* 13:1115-1122.
- 1507
- 1508 119. Finzi A, Xiang SH, Pacheco B, Wang L, Haight J, Kassa A, Danek B, Pancera M,  
1509 Kwong PD, Sodroski J. 2010. Topological layers in the HIV-1 gp120 inner domain  
1510 regulate gp41 interaction and CD4-triggered conformational transitions. *Mol Cell*  
1511 37:656-667.
- 1512
- 1513 120. Chen J, Lee KH, Steinhauer DA, Stevens DJ, Skehel JJ, Wiley DC. 1998.  
1514 Structure of the hemagglutinin precursor cleavage site, a determinant of influenza  
1515 pathogenicity and the origin of the labile conformation. *Cell* 95:409-417.
- 1516
- 1517 121. Lu M, Ma X, Castillo-Menendez LR, Gorman J, Alshafi N, Ermel U, Terry DS,  
1518 Chambers M, Peng D, Zhang B, Zhou T, Reichard N, Wang K, Grover J, Carman BP,  
1519 Gardner MR, Nikić-Spiegel I, Sugawara A, Arthos J, Lemke EA, Smith AB, 3rd, Farzan  
1520 M, Abrams C, Munro JB, McDermott AB, Finzi A, Kwong PD, Blanchard SC, Sodroski  
1521 JG, Mothes, W. 2019. Associating HIV-1 envelope glycoprotein structures with states  
1522 on virus observed by smFRET. *Nature* 568:415-419.
- 1523
- 1524 122. Salimi H, Johnson J, Flores MG, Zhang MS, O'Malley Y, Houtman JC, Schlievert

- 1525 PM, Haim H. 2020. The lipid membrane of HIV-1 stabilizes the viral envelope  
1526 glycoproteins and modulates their sensitivity to antibody neutralization. *J Biol Chem*  
1527 295:348-362.
- 1528
- 1529 123. Mao Y, Wang L, Gu C, Herschhorn A, Xiang SH, Haim H, Yang X, Sodroski J.  
1530 2012. Subunit organization of the membrane-bound HIV-1 envelope glycoprotein trimer.  
1531 *Nat Struct Mol Biol* 19:893-899.
- 1532
- 1533 124. Mao Y, Wang L, Gu C, Herschhorn A, Désormeaux A, Finzi A, Xiang SH,  
1534 Sodroski JG. 2013. Molecular architecture of the uncleaved HIV-1 envelope  
1535 glycoprotein trimer. *Proc Natl Acad Sci U S A* 110:12438-12443.
- 1536
- 1537 125. Wu Z, Zhang S, Wang WL, Ma Y, Dong Y, Mao Y. 2020. Deep manifold learning  
1538 reveals hidden dynamics of proteasome autoregulation. *bioRxiv*  
1539 doi: 10.1101/2020.12.22.423932.
- 1540
- 1541 126. Punjani A, Fleet DJ. 2020. 3D variability analysis: Resolving continuous flexibility  
1542 and discrete heterogeneity from single particle cryo-EM. *bioRxiv*  
1543 doi: 10.1101/2020.04.08.032466.
- 1544
- 1545 127. McCune JM, Rabin LB, Feinberg MB, Lieberman M, Kosek JC, Reyes GR,  
1546 Weissman IL. 1988. Endoproteolytic cleavage of gp160 is required for the activation of  
1547 human immunodeficiency virus. *Cell* 53:55-67.



1548

1549

1550 128. Moyer MP, Huot RI, Ramirez A Jr, Joe S, Meltzer MS, Gendelman HE. 1990.

1551 Infection of human gastrointestinal cells by HIV-1. *AIDS Res Hum Retroviruses* 6:1409-

1552 1415.

1553

1554 129. Juette MF, Terry DS, Wasserman MR, Altman RB, Zhou Z, Zhao H, Blanchard

1555 SC. 2016. Single-molecule imaging of non-equilibrium molecular ensembles on the

1556 millisecond timescale. *Nat Methods* 13:341-344.

1557

1558 130. Potter CS, Chu H, Frey B, Green C, Kisseberth N, Madden TJ, Miller KL,

1559 Nahrstedt K, Pulokas J, Reilein A, Tchong D, Weber D, Carragher B. 1999. Leginon: a

1560 system for fully automated acquisition of 1000 electron micrographs a day.

1561 *Ultramicroscopy* 77:153-161.

1562

1563 131. Cheng A, Negro C, Bruhn JF, Rice WJ, Dallakyan S, Eng ET, Waterman DG,

1564 Potter CS, Carragher B. 2021. Leginon: New features and applications. *Protein Sci*

1565 30:136-150.

1566

1567 132. Mastronarde DN. 2005. Automated electron microscope tomography using

1568 robust prediction of specimen movements. *J Struct Biol* 152:36-51.

1569

- 1570 133. Zheng SQ, Palovcak E, Armache JP, Verba KA, Cheng Y, Agard DA. 2017.  
1571 MotionCor2: anisotropic correction of beam-induced motion for improved cryo-electron  
1572 microscopy. *Nat Methods* 14:331-332.  
1573
- 1574 134. Rohou A, Grigorieff N. 2015. CTFFIND4: Fast and accurate defocus estimation  
1575 from electron micrographs. *J Struct Biol* 192:216-221.  
1576
- 1577 135. Zhang K. Gctf: 2016. Real-time CTF determination and correction. *J Struct Biol*  
1578 193:1-12.  
1579
- 1580 136. Zhu Y, Ouyang Q, Mao Y. 2017. A deep convolutional neural network approach  
1581 to single-particle recognition in cryo-electron microscopy. *BMC Bioinformatics* 18:348.  
1582
- 1583 137. Zivanov J, Nakane T, Forsberg BO, Kimanius D, Hagen WJ, Lindahl E, Scheres  
1584 SH. 2018. New tools for automated high-resolution cryo-EM structure determination in  
1585 RELION-3. *Elife* 7:e42166.  
1586
- 1587 138. Wu J, Ma YB, Congdon C, Brett B, Chen S, Xu Y, Ouyang Q, Mao Y. 2017.  
1588 Massively parallel unsupervised single-particle cryo-EM data clustering via statistical  
1589 manifold learning. *PLoS One* 12:e0182130.  
1590
- 1591 139. Pettersen, E. F. et al. 2004. UCSF Chimera—a visualization system for  
1592 exploratory research and analysis. *J Comput Chem* 25:1605-1612.

1593 140. Casañal A, Lohkamp B, Emsley P. 2020. Current developments in Coot for  
1594 macromolecular model building of electron cryo-microscopy and crystallographic data.  
1595 Protein Sci 29:1069-1078.

1596

1597 141. Afonine PV, Poon BK, Read RJ, Sobolev OV, Terwilliger TC, Urzhumtsev A,  
1598 Adams PD. 2018. Real-space refinement in PHENIX for cryo-EM and crystallography.  
1599 Acta Crystallogr D Struct Biol 74:531-544.

1600

1601 142. The PyMOL Molecular Graphics System Version 1.8 (Schrödinger, LLC).

1602

1603 143. Kucukelbir A, Sigworth FJ, Tagare HD. 2014. Quantifying the local resolution of  
1604 cryo-EM density maps. Nat Methods 11:63-65.

1605

1606

1607

1608 **FIGURE LEGENDS**

1609

1610 **Figure 1. Antibody recognition of cleaved and uncleaved HIV-1 Envs on the cell**  
1611 **surface.** (A) HOS cells transiently expressing the wild-type HIV-1<sub>JR-FL</sub> Env, a fraction of  
1612 which is cleaved in these cells, were incubated with the indicated broadly neutralizing  
1613 antibodies or poorly neutralizing antibodies. After washing and lysis of the cells, the  
1614 antibody-Env complexes were purified with Protein A-Sepharose beads and analyzed  
1615 by Western blotting with a rabbit anti-gp120 polyclonal serum. (B) The effect of  
1616 crosslinking with BS3 and/or BMS-806 treatment on antibody binding to HIV-1<sub>JR-FL</sub>  
1617 Env(-) on the surface of CHO cells was evaluated by cell-based ELISA. BMS-806 (10  
1618 µM) was added to the CHO cells at the time of induction of Env(-) expression with  
1619 doxycycline. All values were normalized against 2G12 antibody binding and were  
1620 derived from at least three independent experiments. Note that the HIV-1<sub>JR-FL</sub> Env(-)  
1621 glycoprotein is not recognized by the PGT145 V2 quaternary antibody, which serves as  
1622 a negative control.

1623

1624 **Figure 2. Characterization of the full-length HIV-1<sub>JR-FL</sub> Env(-) glycoprotein in CHO**  
1625 **cell lysates and in detergent-solubilized purified forms.** (A) Purified HIV-1<sub>JR-FL</sub>  
1626 Env(-) without and with crosslinking by BS3 was run on a NUPAGE 4-12% BT gel  
1627 stained by Coomassie Blue. (B) Purified HIV-1<sub>JR-FL</sub> Env(-) crosslinked by BS3 was run  
1628 on a NativePAGE 4-16%BT gel and subjected to Western blotting with an HRP-  
1629 conjugated anti-HIV-1 gp120 antibody. (C-E) To evaluate the effect of BMS-806 on the

1630 glycosylation of the synthesized Env(-) glycoprotein, BMS-806 (10  $\mu$ M) was added to  
1631 the CHO cells at the time of doxycycline induction. (C) The effect of BMS-806 on  
1632 HIV-1<sub>JR-FL</sub> Env(-) glycosylation was evaluated by Western blotting after digestion with  
1633 glycosidases (sialidase, Peptide-N-glycosidase F (PNGase F), and Endoglycosidase H  
1634 (Endo H)). The purified HIV-1<sub>JR-FL</sub> Env(-) glycoproteins were digested with the indicated  
1635 glycosidase, run on a NUPAGE 4-12% BT gel, and subjected to Western blotting with  
1636 an HRP-conjugated anti-HIV-1 gp120 antibody. The results shown are representative of  
1637 those obtained in three independent experiments. Note that BMS-806 treatment  
1638 decreases Env(-) heterogeneity by reducing the levels of sialidase-sensitive and Endo  
1639 H-resistant glycoforms. (D,E) The bar graphs show the glycan profiles at each  
1640 glycosylation site of HIV-1<sub>JR-FL</sub> Env(-) purified from untreated CHO cells (D) or CHO  
1641 cells treated with 10  $\mu$ M BMS-806 (E), as determined by mass spectrometry. The  
1642 glycan composition (in percent) was broadly characterized as high-mannose (red bars)  
1643 or processed (complex + hybrid) glycans (blue bars).

1644

1645 **Figure 3. Conformations of purified HIV-1<sub>JR-FL</sub> Env(-) treated with BMS-806 and**  
1646 **crosslinked with BS3.** (A) HIV-1<sub>JR-FL</sub> Env(-) with V1 and V4 labeling tags was purified  
1647 from 293T cell membranes using a protocol identical to that used for preparation of  
1648 Env(-) for cryo-EM imaging. The purified Env(-) was labeled and analyzed by smFRET.  
1649 FRET trajectories were compiled into a population FRET histogram and fit to the  
1650 Gaussian distributions associated with each conformational state, according to a hidden  
1651 Markov model (42). The percentage of the population that occupies each state as well  
1652 as the number of molecules analyzed (N) is shown. The error bars represent the

1653 standard deviation from three independent data sets. (B) Membranes from BMS-806-  
1654 treated CHO cells expressing HIV-1<sub>JR-FL</sub> Env(-) were crosslinked with BS3 and then  
1655 solubilized in Cymal-5 detergent. The lysate was successively incubated with the 19b  
1656 anti-gp120 (V3) antibody and Protein-A Sepharose beads. The Env(-) glycoproteins  
1657 precipitated by the 19b antibody or by the negative-control Protein A-Sepharose beads  
1658 during the indicated rounds of immunoprecipitation were analyzed by SDS-PAGE and  
1659 Western blotting (upper left panel). The Env(-) glycoproteins in the initial cell membrane  
1660 lysate (Input) and those glycoproteins remaining after four rounds of 19b  
1661 counterselection were precipitated with Ni-NTA beads or the indicated antibodies; the  
1662 precipitated Env(-) glycoproteins were analyzed by SDS-PAGE and Western blotting  
1663 (upper right panel). The total amounts of Env(-) glycoprotein in the input and after 19b  
1664 counterselection, normalized to the input Env(-) glycoprotein amount precipitated by the  
1665 Ni-NTA beads, are shown in the bar graph (lower panel). Means and standard  
1666 deviations derived from two independent experiments are shown.

1667

1668 **Figure 4. Cryo-EM analysis of the full-length HIV-1<sub>JR-FL</sub> Env(-) trimer.** (A) A typical  
1669 cryo-EM micrograph of Env(-) trimers taken with a Gatan K2 direct electron detector at 0  
1670 degrees of tilt. (B) Fourier transform of the image in A. (C) Unsupervised 2D class  
1671 averages for non-tilt particles. (D) A typical cryo-EM micrograph of Env(-) trimers taken  
1672 with a Gatan K2 direct electron detector at 45 degrees of tilt. (E) Fourier transform of the  
1673 image in D. (F) Unsupervised 2D class averages for tilted particles. (G) The local  
1674 resolution measurement of the State-U<sub>1</sub> and State-U<sub>2</sub> maps, as measured by ResMap  
1675 (143). The maps are colored according to the local resolution, indicated by the color

1676 gradient (units in Angstroms). Side views of the Env(-) maps are shown, with gp120 at  
1677 the bottom of the figure and gp41 at the top. (H) The gold-standard FSC plots of the  
1678 State-U<sub>1</sub> and State-U<sub>2</sub> cryo-EM maps.

1679

1680 **Figure 5. Comparison of U<sub>1</sub> and U<sub>2</sub> Env(-) structures.** (A) Protomer 2 of the State-U<sub>1</sub>  
1681 and State-U<sub>2</sub> models are superposed, showing that protomer 1 and protomer 3 are  
1682 rotated 4.0° and 2.8°, respectively. (B) Three protomers of the State-U<sub>1</sub> model are  
1683 superposed. (C) Three protomers of the State-U<sub>2</sub> model are superposed. (D) With  
1684 protomer 2 of the State-U<sub>1</sub> and State-U<sub>2</sub> models superposed, the C $\alpha$  distances between  
1685 the same residues on the U<sub>1</sub> and U<sub>2</sub> structures are measured for four residues (from (i)  
1686 to (iv): T90, D230, S481 and N392). In the side views of Env(-) shown in B-D, gp120 is  
1687 at the bottom of the figure and gp41 at the top.

1688

1689 **Figure 6. Comparison of Env(-) structures with those of cleaved HIV-1 Envs.**

1690 (A) Left: Protomer 1 of the State-U<sub>1</sub> trimer is superposed on the unliganded HIV-1<sub>BG505</sub>  
1691 sgp140 SOSIP.664 trimer (PDB ID 4ZMJ) (104), demonstrating how the other two  
1692 protomers in State-U<sub>1</sub> are rotated towards each other. Right: Side views of the  
1693 superposed protomers, with red parts representing the major areas of difference  
1694 between the two protomers. (B) Left: Protomer 1 of the State-U<sub>1</sub> trimer is superposed on  
1695 the HIV-1<sub>JR-FL</sub> Env $\Delta$ CT trimer complexed with PGT151 Fabs (PDB ID 5FUU) (105),  
1696 indicating that binding of the PGT151 antibodies introduces asymmetry into the Env  
1697 trimer that differs from that of U<sub>1</sub>. Right: Side views of the superposed protomers, with  
1698 red parts representing the major areas of difference between the two protomers. In the

1699 side views of the Env protomers shown in the right-hand panels of A and B, gp120 is at  
1700 the bottom of the figure and gp41 at the top.

1701

1702 **Figure 7. Comparison of Env trimer geometry among Env(-) trimers and mature**  
1703 **Env trimers.** (A) The inter-protomer distances (in Å) between selected atoms of gp120  
1704 and gp41 are shown for different Env structures: the smaller, inner triangle depicts  
1705 distances measured between gp41 residues W628 and I635; the larger, outer triangle  
1706 depicts distances measured between gp120 residues A336 and Q352. The U<sub>1</sub> and U<sub>2</sub>  
1707 structures are compared with those of the unliganded sgp140 SOSIP.664 trimer (PDB  
1708 ID 4ZMJ) (104) and the PGT151-bound HIV-1<sub>JR-FL</sub> and HIV-1<sub>AMC011</sub> EnvΔCT trimers  
1709 (PDB IDs 5FUU and 6OLP, respectively) (105,108). For 5FUU and 6OLP, the sides of  
1710 the Env trimer that are bound by the PGT151 Fabs are marked. (B) The three gp120  
1711 subunits of four Env trimer atomic structures were superposed with the gp120 subunits  
1712 of the State-U<sub>1</sub> Env(-) trimer. Each protomer was aligned separately. After gp120  
1713 alignment, the relative positions of the gp41 HR1<sub>C</sub> helices are jointly shown here. In  
1714 each case, the U<sub>1</sub> HR1<sub>C</sub> helices are colored cyan. With gp120 aligned, the gp41 in  
1715 State U<sub>1</sub> is displaced compared with the other structures. Upper row: top views of 3-  
1716 helix bundles; Bottom row: side views of 3-helix bundles. 5FYK is the structure of an  
1717 HIV-1<sub>JR-FL</sub> sgp140 SOSIP.664 trimer complexed with several neutralizing antibody Fabs  
1718 (65).

1719

1720 **Figure 8. Relationship between HR1<sub>N</sub> helicity and the opening angle of the trimer.**



1721 (A) Sequences of the gp41 HR1<sub>N</sub> region from three U<sub>1</sub> protomers are shown, with  
1722 residues in  $\alpha$ -helices highlighted in red. (B) The relationship between HR1<sub>N</sub> helicity and  
1723 the opening angle of three asymmetric HIV-1 Env trimers (U<sub>1</sub> and two PGT151-Fab-  
1724 bound Env $\Delta$ CT trimers (PDB IDs 5FUU and 6OLP)) is shown. The x-axis represents  
1725 the opening angle for each of three sides, measured using the  
1726 “angle\_between\_domains” command in Pymol (142). The y-axis represents the number  
1727 of residues in an  $\alpha$ -helical conformation for the HR1<sub>N</sub> region of that side. (C) The HR1<sub>N</sub>  
1728 and HR1<sub>C</sub> regions from the three indicated atomic models are superposed. (D) The  
1729 HR1<sub>N</sub> regions from the three protomers in State U<sub>1</sub> are shown .

1730

1731 **Figure 9. HIV-1<sub>JR-FL</sub> Env(-) glycan structure.** Glycans on State-U<sub>1</sub> trimers are colored  
1732 according to the following scheme: glycans that exhibit significant decreases in the  
1733 addition of processed glycans as a result of BMS-806 treatment are colored purple;  
1734 high-mannose glycans are colored yellow; and the remaining mixed or processed  
1735 glycans that are not affected by BMS-806 binding are colored green.

1736

1737 **Figure 10. BMS-806 binding site.** The BMS-806 binding sites within three protomers  
1738 of the State-U<sub>1</sub> structure (cyan) are compared with those in the BMS-806-bound sgp140  
1739 SOSIP.664 trimer (PDB 5U70) (118).

1740

1741 **Figure 11. Effect of BMS-806 on the synthesis, processing and glycosylation of**  
1742 **wild-type HIV-1<sub>AD8</sub> Env.** A549-Gag/Env cells were treated with BMS-806 (10  $\mu$ M) or  
1743 mock treated during doxycycline induction of Gag/Env expression. Lysates were

1744 prepared from cells (A) and supernatants containing virus-like particles (VLPs) (B), and  
1745 were treated with Peptide-N-glycosidase F (PNGase F) or Endoglycosidase Hf (Endo  
1746 Hf), or mock treated (no Rx). The Envs were run on reducing SDS-polyacrylamide gels  
1747 and analyzed by Western blotting. The deglycosylated gp160, gp120 and gp41 proteins  
1748 (dgp160, dgp120 and dgp41, respectively) are indicated by arrows (red – PNGase F-  
1749 treated sample; green – Endo Hf-treated sample). Data in this figure are representative  
1750 of those obtained in two independent experiments.  
1751

**A**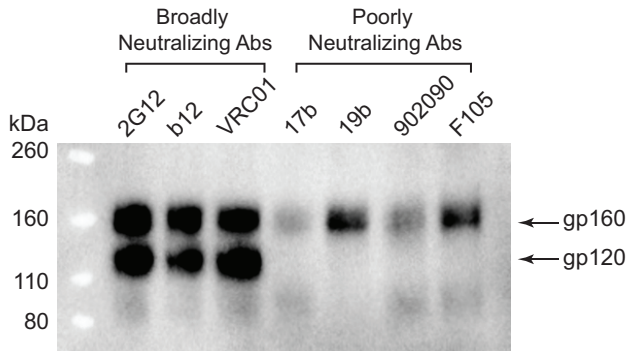**B**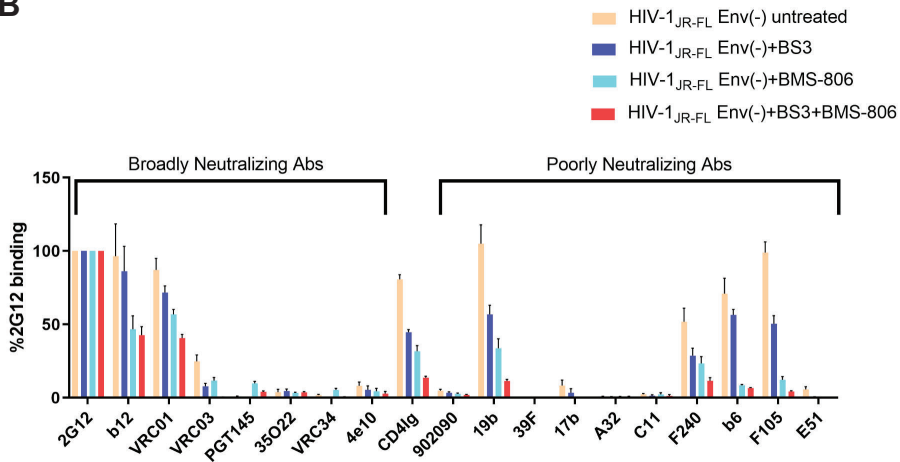

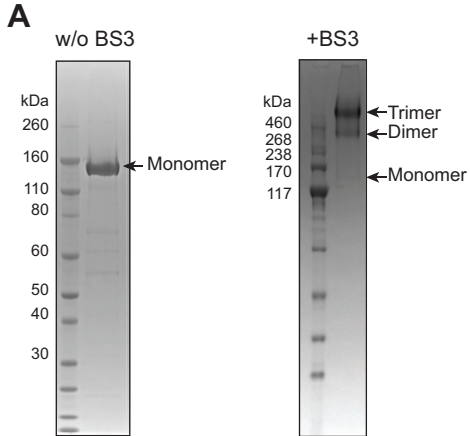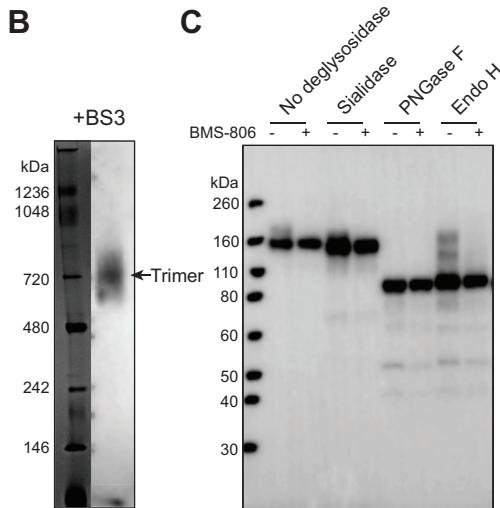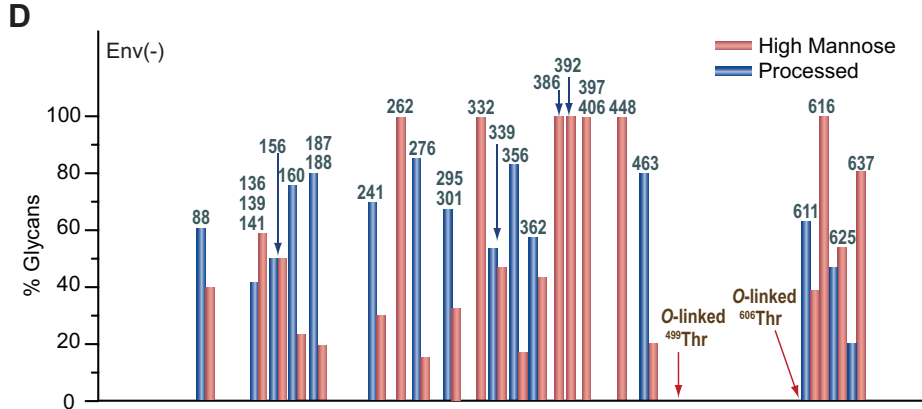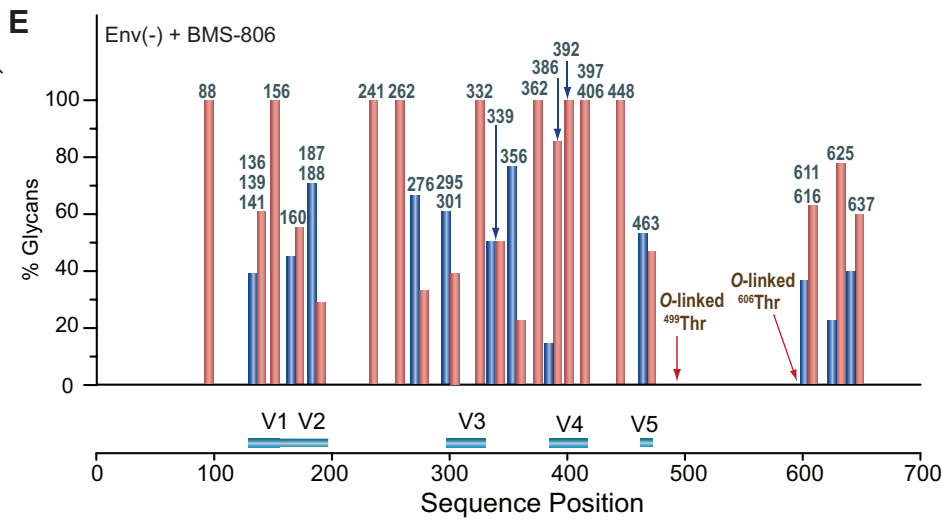

**A**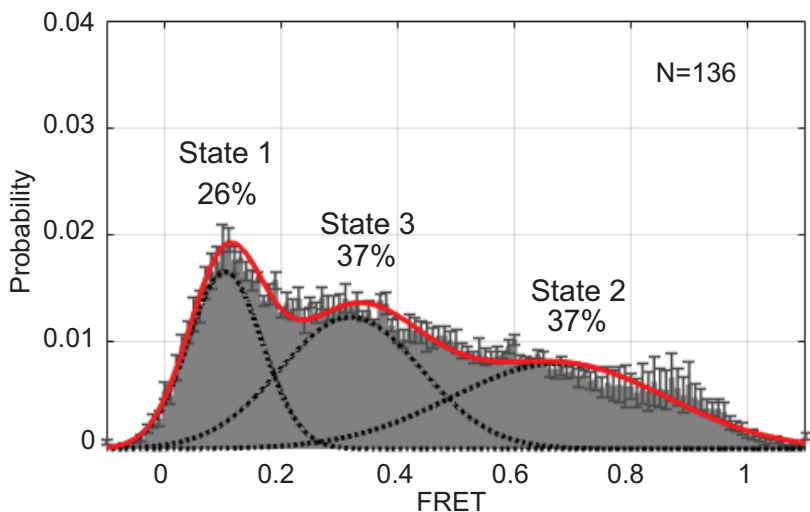**B**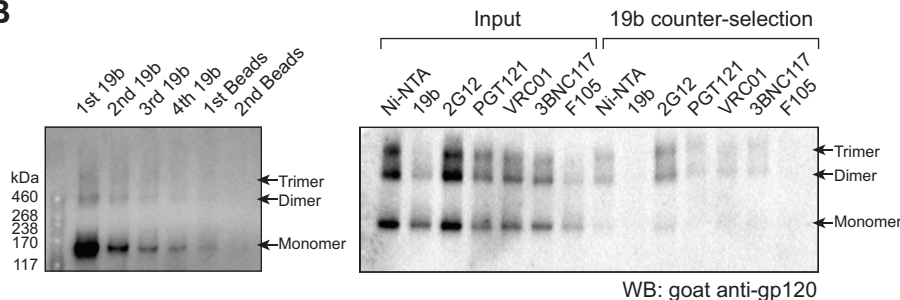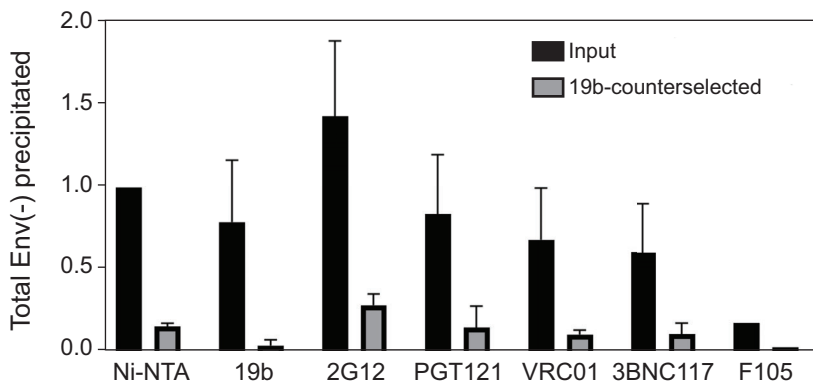

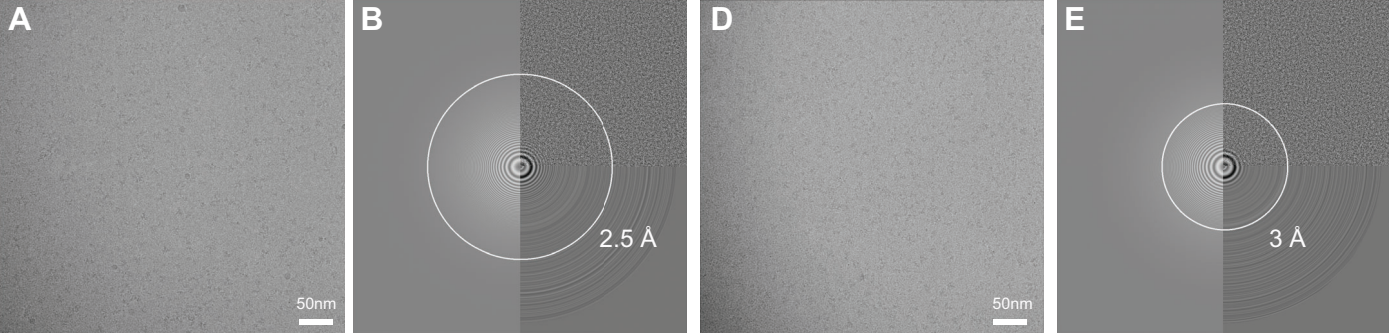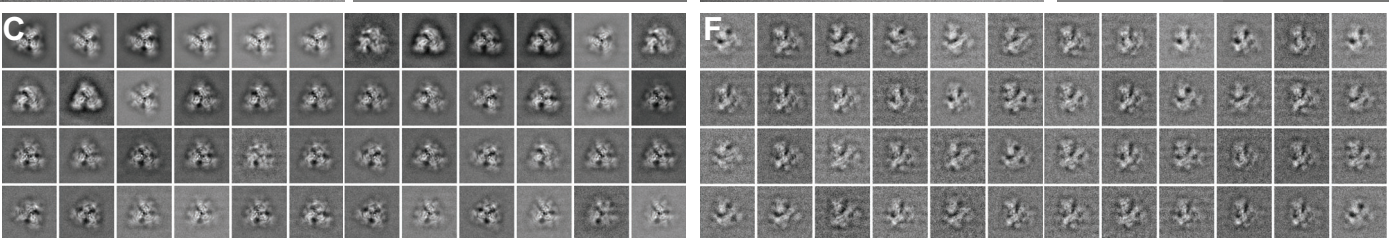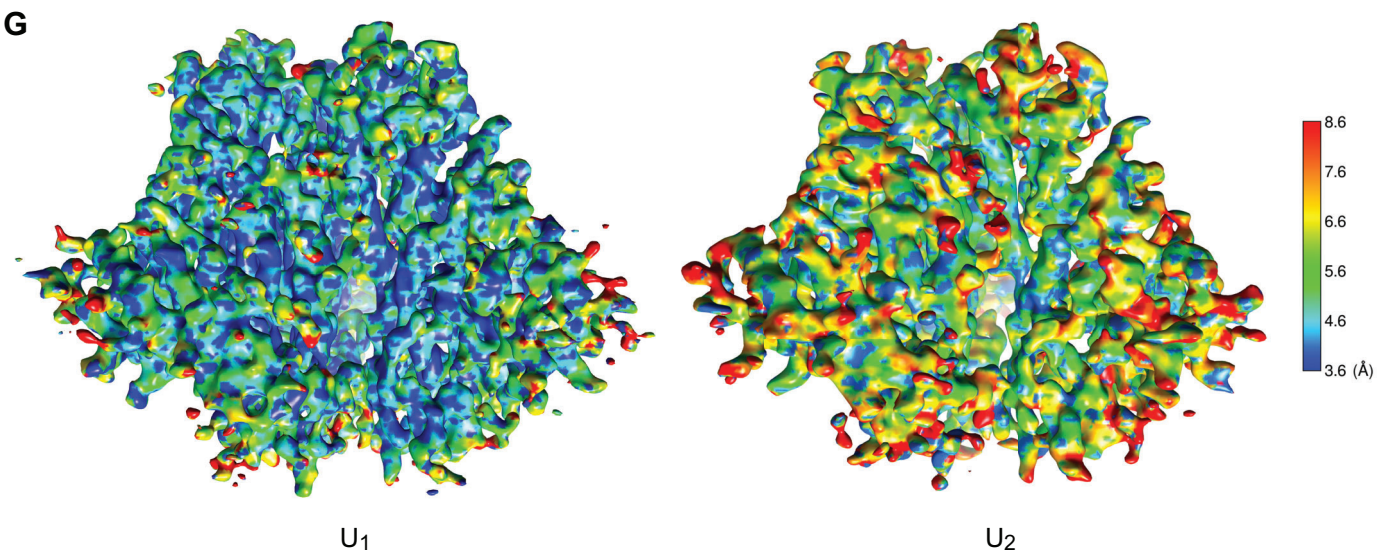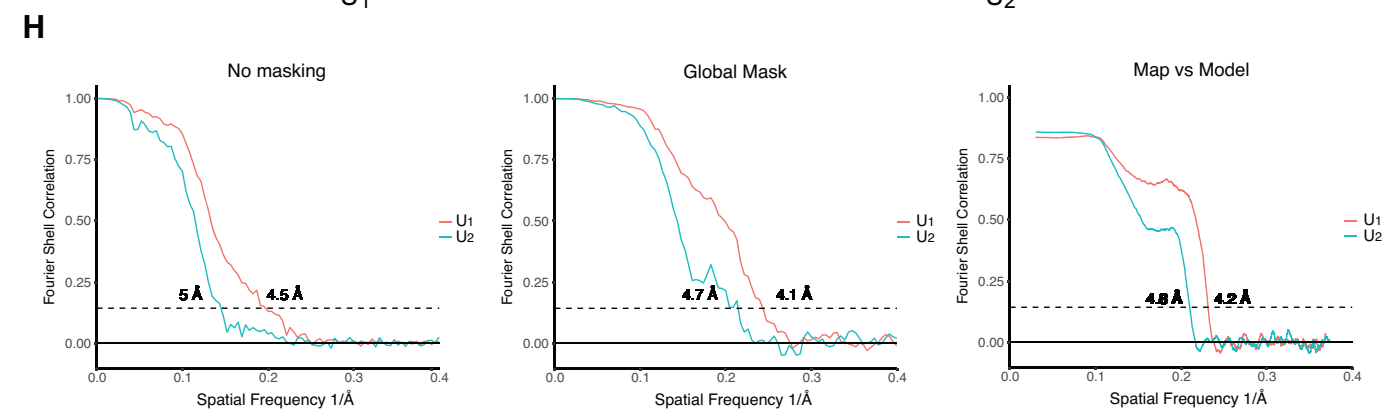

**A**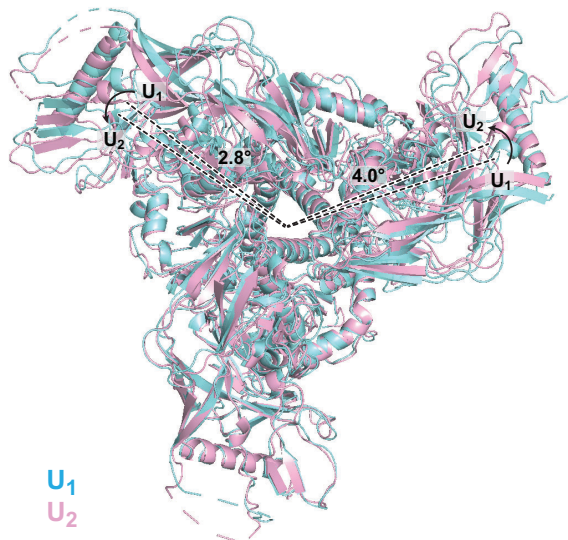**B**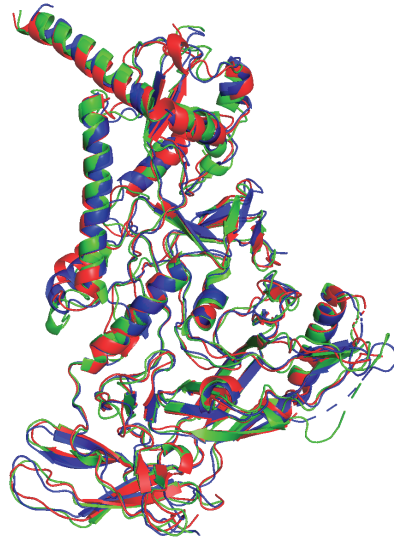**C**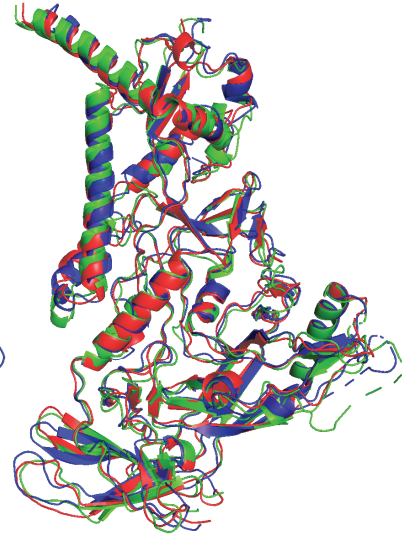**D**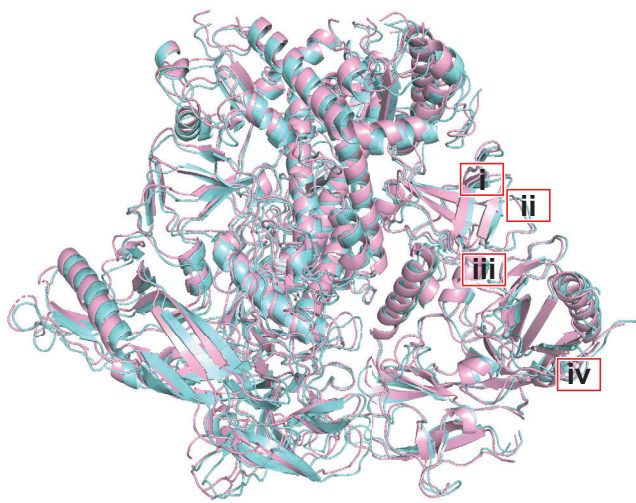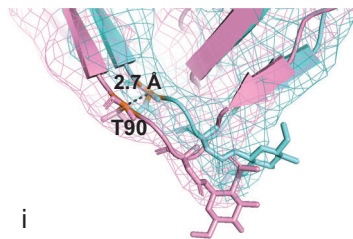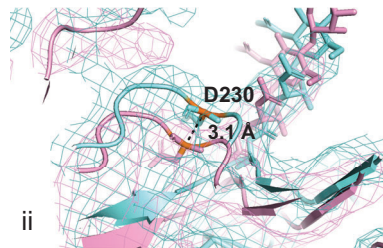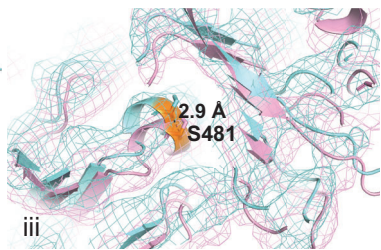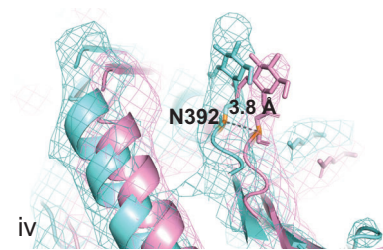

**A**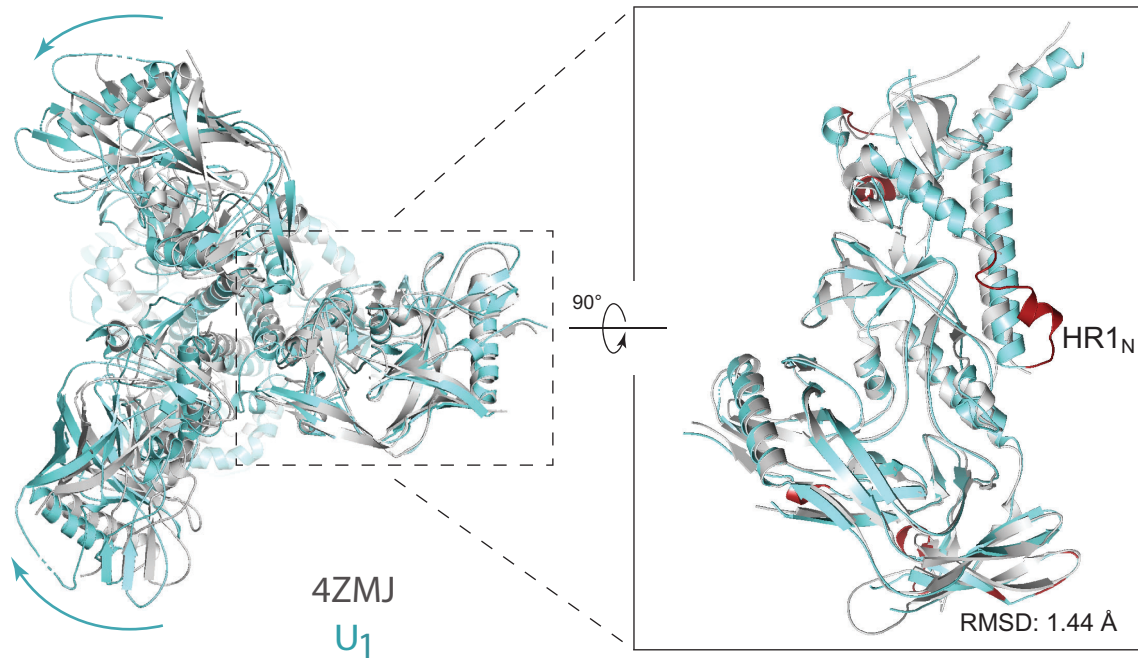**B**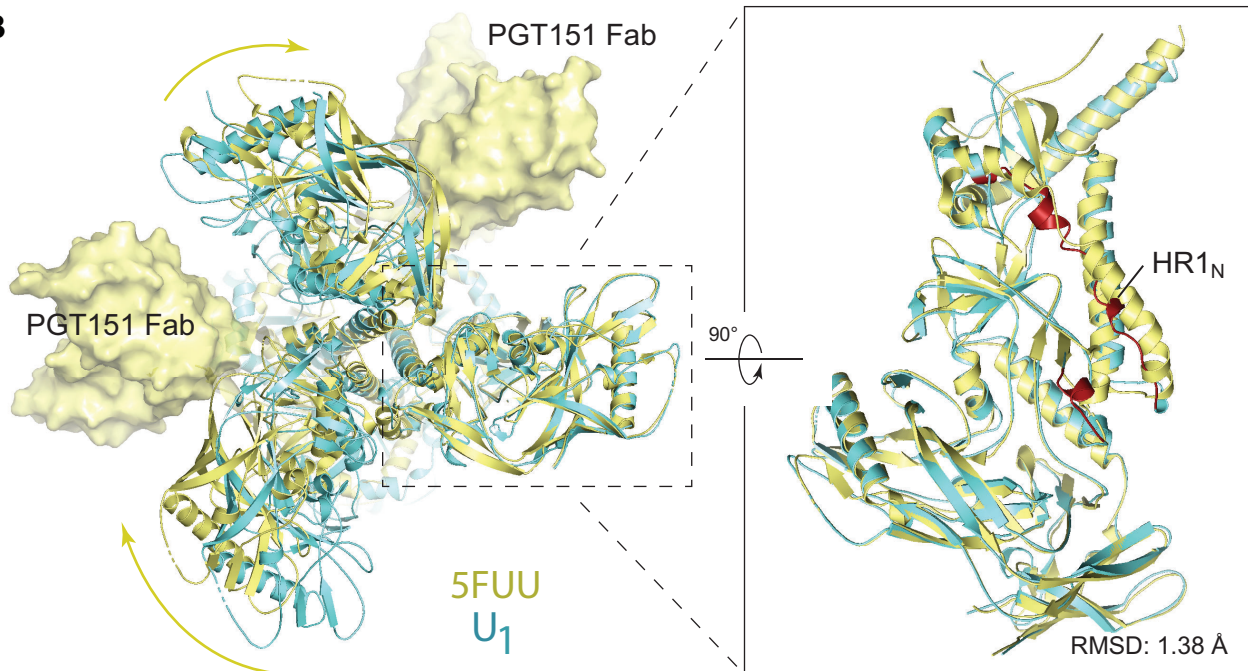



**A**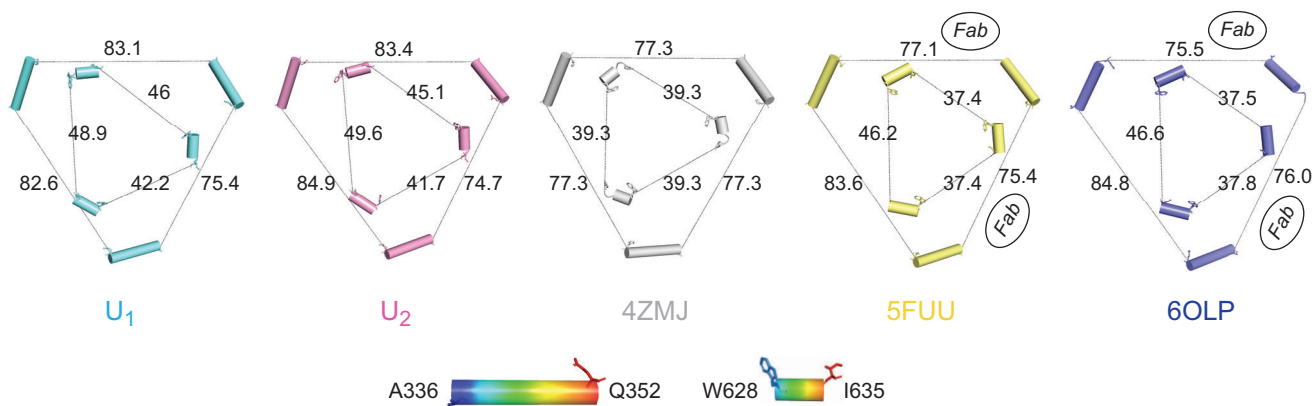**B**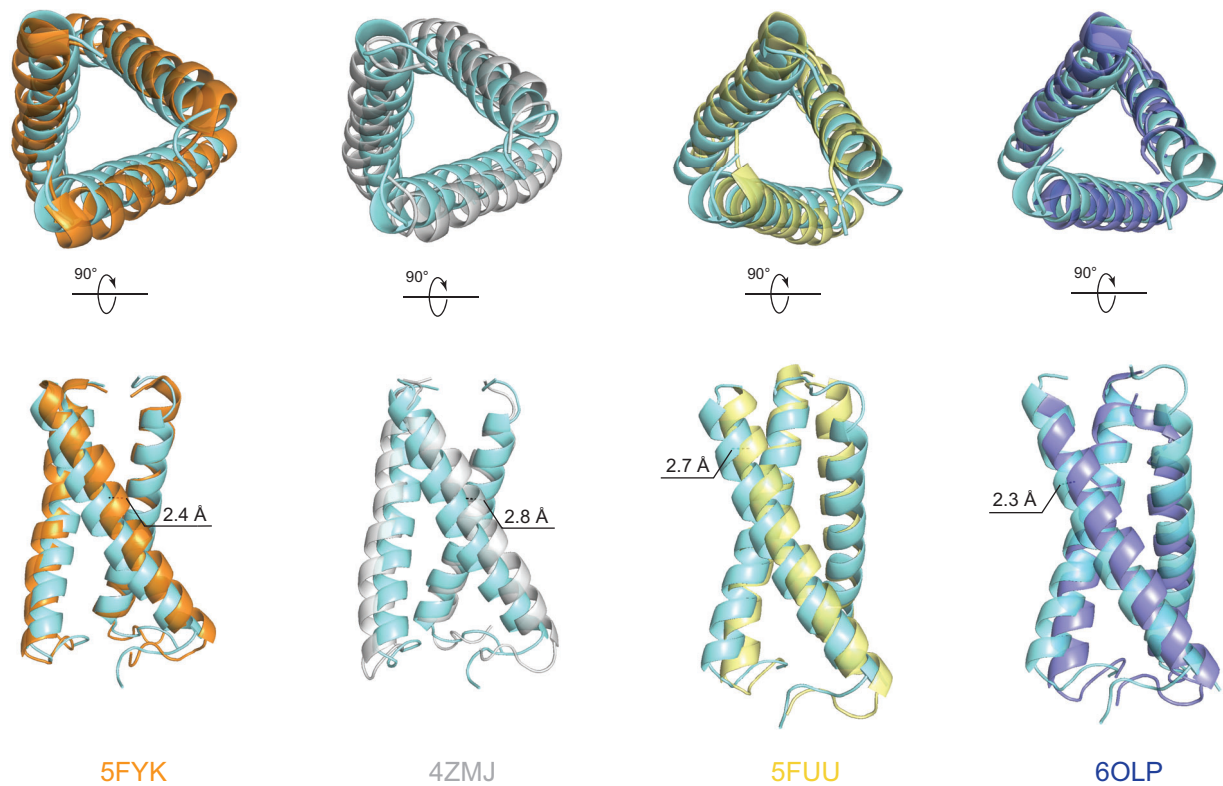

**A**

Chain A: SMTLTVQARLLLSGIVQQQNNLLRAIEAQQRMLQLTV

Chain B: SMTLTVQARLLLSGIVQQQNNLLRAIEAQQRMLQLTV

Chain C: SMTLTVQARLLLSGIVQQQNNLLRAIEAQQRMLQLTV

**C**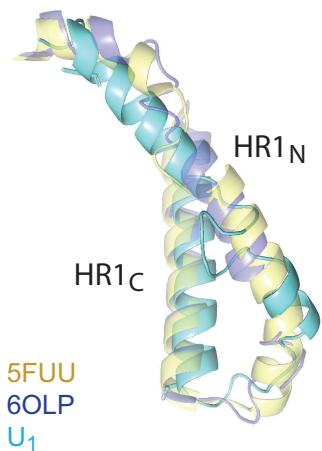**D**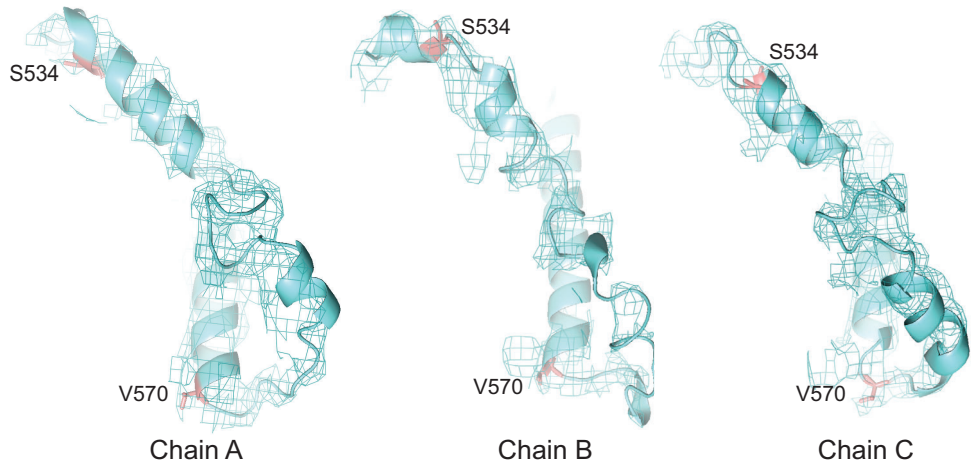**B**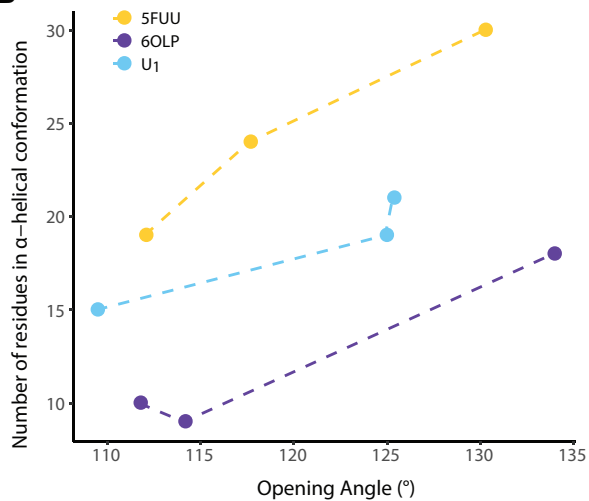

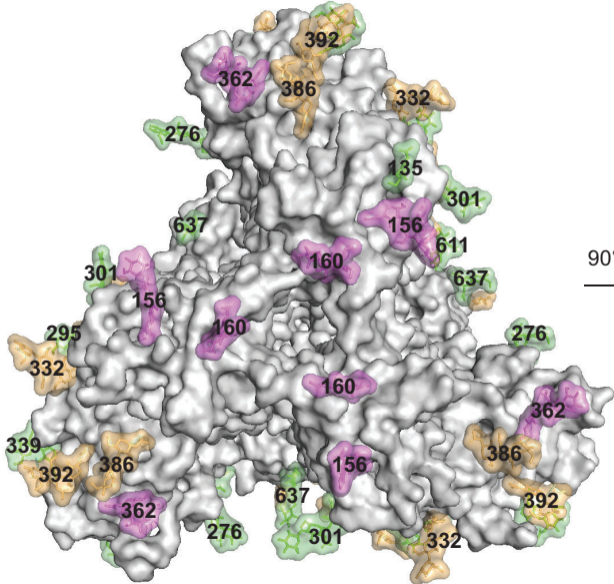

90°

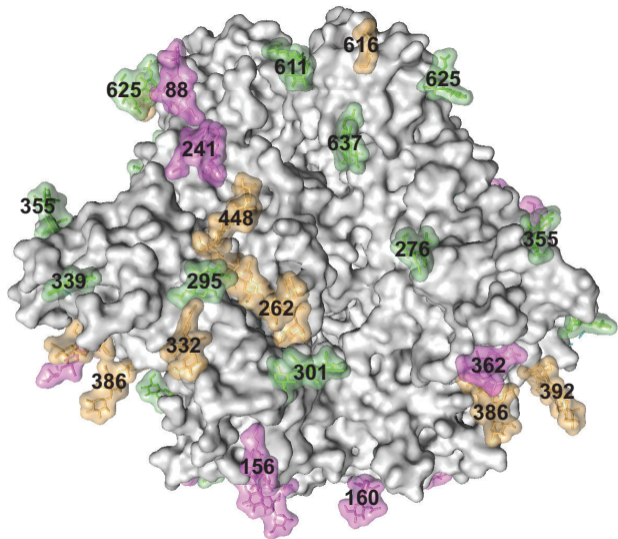

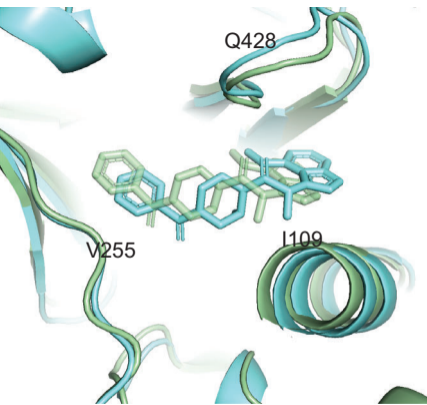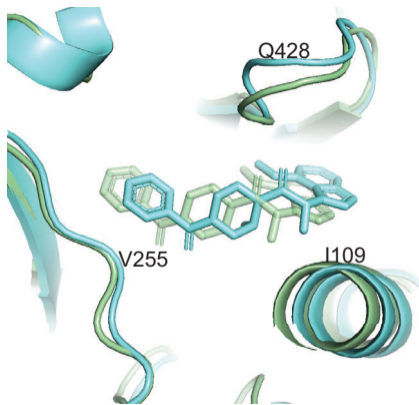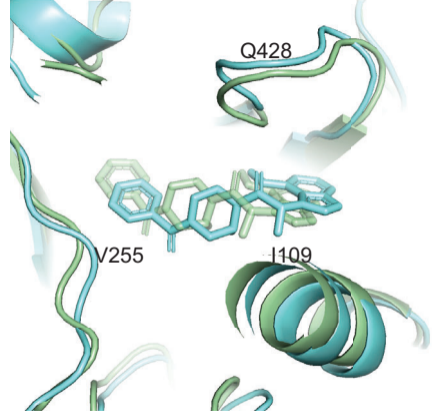

Source: https://www.biorxiv.org/content/10.1101/2021.03.28.437443v1.full.pdf
